1 **Two phosphoglucomutase paralogs regulate triggered secretion**  
2 **of the *Toxoplasma* micronemes**

3

4

5 Sudeshna Saha<sup>1</sup>, Bradley I. Coleman<sup>1</sup>, Tiffany Sansom<sup>2</sup>, Rashmi Dubey<sup>1</sup>, Ira J. Blader<sup>2</sup>  
6 and Marc-Jan Gubbels<sup>1\*</sup>

7

8 <sup>1</sup>Department of Biology, Boston College, Chestnut Hill, MA 02467, USA

9 <sup>2</sup>Department of Microbiology and Immunology, University at Buffalo School of Medicine,  
10 Buffalo, NY 14214, USA

11

12 \*corresponding author: [gubbelsj@bc.edu](mailto:gubbelsj@bc.edu)

13

14

15

16

17 **Plain Language Summary**

18

19 Calcium mediated control of microneme secretion is essential for host cell invasion and  
20 egress of *Toxoplasma gondii*. Here it is shown that the two phosphoglucomutases in  
21 *Toxoplasma* both function in the translation of a spike in calcium into a burst in microneme  
22 secretion.

23

24

25 **Keywords**

26 *Toxoplasma*, micronemes, calcium, parafusin, phosphoglucomutase

27 **Abstract**

28 Parafusin is a phosphoglucomutase (PGM) paralog that acts as a signaling scaffold  
29 protein in calcium mediated exocytosis across many eukaryotes. In *Toxoplasma gondii* the  
30 parafusin related protein 1 (PRP1) has been associated in indirect and heterologous  
31 studies with the regulated exocytosis of the micronemes, which are required for successful  
32 host cell invasion and egress. Here we directly assessed the role of PRP1 by deleting the  
33 gene from the parasite. We observed a specific defect in microneme secretion in response  
34 to high  $\text{Ca}^{2+}$  fluxes, but not to phosphatidic acid fluxes controlling microneme release. We  
35 observed no defect in constitutive microneme secretion which was sufficient to support  
36 completion of the lytic cycle. Furthermore, deletion of the other PGM in *Toxoplasma*,  
37 PGM2, as well as the double PRP1/PGM2 deletion resulted in a similar phenotype. This  
38 suggests a functional interaction between these two genes. Strikingly, tachyzoites without  
39 both paralogs are completely viable *in vitro* and during acute mice infections. This  
40 indicates that PGM activity is neither required for glycolysis. In conclusion, the PRP1-  
41 PGM2 pair is required for a burst in microneme secretion upon high  $\text{Ca}^{2+}$  fluxes, but this  
42 burst is not essential to complete the lytic cycle of the parasite.

## 43 Introduction

44 The apicomplexan parasite *Toxoplasma gondii* has infected 1 in every 3 humans  
45 globally but most acute infections pass with mild or no symptoms (Montoya & Liesenfeld,  
46 2004). However, severe disease occurs congenitally in pregnant women (Remington *et al.*,  
47 1995) and in immunocompromised patients (i.e. AIDS patients) where reactivation of a  
48 chronic infection can result in life-threatening encephalitis or myocarditis (Weiss & Dubey,  
49 2009). The clinical manifestation results from the active invasion, intracellular replication  
50 and egress required by the lytic cycle. As such host cell invasion is a critical event in  
51 pathogenesis (Blader *et al.*, 2015). Unlike some other intracellular pathogens, host cell  
52 invasion by *Toxoplasma* is a parasite-directed event requiring parasite motility and  
53 sequential secretion of three different secretory organelles (Baum *et al.*, 2008, Meissner *et*  
54 *al.*, 2013). The secretion of the first organelle, the micronemes, is regulated by intracellular  
55 calcium ( $\text{Ca}^{2+}$ ) fluxes (Lourido & Moreno, 2015, Wetzel *et al.*, 2004, Sidik *et al.*, 2016a),  
56 however the molecular mechanism underlying this control, especially the late events  
57 facilitating exocytosis, is still incompletely understood.

58 The phosphoglucomutase (PGM) family comprises glycolytic enzymes that  
59 interconvert glucose-1-phosphate and glucose-6-phosphate. However, a PGM ortholog  
60 also known as parafusin or PFUS is present in many different organisms including ciliates,  
61 yeast and humans that functions in  $\text{Ca}^{2+}$  signaling (Levin *et al.*, 1999, Andersen *et al.*,  
62 1994, Subramanian *et al.*, 1994, Satir *et al.*, 1989, Satir *et al.*, 2015). The *Toxoplasma*  
63 genome encodes two PGM paralogs: PGM1 (TGME49\_285980), also referred to as  
64 parafusin-related protein 1 (PRP1), and PGM2 (TGME49\_318580) (Imada *et al.*, 2010). In  
65 the ciliate *Paramecium* PFUS has been associated with  $\text{Ca}^{2+}$ -mediated exocytosis of its  
66 dense core secretory vesicles (DCSVs) (Gilligan & Satir, 1982, Plattner & Kissmehl, 2005).  
67 In *Paramecium* PFUS associates with the DCSVs acting as scaffold with a direct role in  
68 membrane fusion (Zhao & Satir, 1998). Furthermore, PFUS also has a role in DCSV  
69 assembly in both *Paramecium* (Liu *et al.*, 2011) and *Tetrahymena* (Chilcoat & Turkewitz,  
70 1997) and is hypothesized to impact the local rather than systemic release of the matured  
71 DCSVs (Plattner & Kissmehl, 2005). In ciliates PFUS is dynamically phosphorylated in a  
72  $\text{Ca}^{2+}$ -dependent fashion related to  $\text{Ca}^{2+}$ -dependent DCSV exocytosis (Subramanian &  
73 Satir, 1992, Wyroba *et al.*, 1995, Satir *et al.*, 1990, Matthiesen *et al.*, 2003): in its  
74 phosphorylated state PFUS associates with the vesicles closest to the plasma membrane,  
75 priming them for secretion; however for actual membrane fusion to take place PFUS has  
76 to be dephosphorylated through calcineurin (Plattner & Kissmehl, 2005). More recently,

77 additional roles for PFUS have been uncovered as it was found to be associated with the  
78 base of cilia and nucleus in ciliates as well as mammalian cells (Satir et al., 2015) whereas  
79 in yeast PFUS has been associated with regulating  $\text{Ca}^{2+}$  homeostasis (Fu et al., 2000).  
80 Germane to *Toxoplasma*, the ortholog PRP1 has been shown to localize to the most  
81 apical micronemes, its phosphorylation status is  $\text{Ca}^{2+}$ -dependent, and through  
82 heterologous evaluation of PRP1 in *Paramecium*, an orthologous function in  $\text{Ca}^{2+}$ -  
83 mediated microneme secretion has been proposed (Matthiesen et al., 2001, Matthiesen et  
84 al., 2003).

85 Here we directly evaluated the role of PRP1 and PGM2 through gene deletions in  
86 *Toxoplasma*. We show that both paralogs are required for microneme secretion in  
87 response to high  $\text{Ca}^{2+}$  spikes, which occur during host cell invasion and egress. However,  
88 both paralogs are expendable for constitutive microneme secretion under conditions  
89 mimicking gliding motility between host cells. Strikingly, tachyzoites without both paralogs  
90 are completely viable *in vitro* as well as during acute mice infections. These data suggest  
91 that the *Toxoplasma* PGMs are dispensable for  $\text{Ca}^{2+}$ -dependent exocytosis and glycolysis  
92 during the lytic cycle.

93

94

## 95 **Results**

96

### 97 **PRP1 is conserved across the coccidia**

98 To establish whether PRP1 has a universal role in exocytosis across the Apicomplexa we  
99 first explored the conservation and phylogeny of PGMs in the Apicomplexan and their  
100 closely related free-living relatives, the Chromerids. Both TgPGM1 and TgPGM2 were  
101 compared to the validated PGM1/parafusins in ciliates and the crown eukaryotes (Fig 1).  
102 Consistent with the observation that PGM gene duplication occurred before the evolution  
103 of the eukaryotic cell (Satir et al., 2015), these results show that all PGM1 sequences  
104 cluster together and are uniquely distinct from the PGM2 sequences. The conservation of  
105 both PGM1 and PGM2 is very different for different apicomplexan sub-groups. Although  
106 *Toxoplasma* and the other cyst-forming coccidia (*Hammondia hammondi*, *Neospora*  
107 *caninum*, and *Sarcocystis neurona*) have both PGM1 and PGM2, the non-cyst forming  
108 coccidia, i.e. *Eimeria* spp., only encode one PGM1 ortholog. In the genus *Plasmodium*, *P.*  
109 *falciparum* only encodes PGM2 but not *P. chabaudi* and *P. berghei* contain both whereas  
110 *Cryptosporidium* spp and the related *Gregarina niphandrodes* only encode PGM1; in fact,

111 *Cr. parvum* and *Cr. muris* encode two slightly different PGM1 isotypes encoded in tandem  
112 in the genome. We did not find any annotated PGM in the genome of *Theileria annulata*.  
113 On the other hand, both Chromerids (*Chromera Velia* and *Vitrella brassicaformis*) contain  
114 both PGM1 and PGM2. The ciliates *Paramecium tetraurelia* and *Tetrahymena thermophile*  
115 only contain PGM1. Overall, we interpret the data to mean that the common ancestor of  
116 the Alveolata contained both PGM1 and PGM2. This is still seen in some extant lineages  
117 like *Toxoplasma*, but in other lineages either one has been lost. Hence, since *Toxoplasma*  
118 contains both isoforms, it is an ideal organism to study the contribution of these unique  
119 glycolytic enzymes either to metabolism and/or Ca<sup>2+</sup>-dependent exocytosis.

120

### 121 **PRP1 is not required for completion of the lytic cycle**

122 The first question we addressed is whether PRP1 is essential. We generated a direct  
123 PRP1-KO parasite line by replacing the PRP1 gene with an HXGPRT selectable marker  
124 (Fig S1). To validate the loss of protein expression we generated a specific polyclonal  
125 antiserum against amino acids 446 to 637 in the C-terminal protein region of PRP1, which  
126 is not shared with PGM2 (Fig 2A). PRP1 is undetectable in the direct KO line ( $\Delta$ PRP1).  
127 This result immediately indicated that PRP1 is not required to complete the lytic cycle.  
128 However, it is possible that the  $\Delta$ PRP1 line has a growth disadvantage. We therefore  
129 performed plaque assays and compared plaque number and size to the parent line (Fig  
130 2B). We observed similar plaque number for the parent and  $\Delta$ PRP1 lines but a minor yet  
131 significant fitness advantage for the parasites lacking PRP1, as determined by total area  
132 of the plaques. Since PRP1 was first described for its involvement in microneme secretion  
133 we tested two essential processes relying on microneme secretion: host cell egress and  
134 invasion. We tested both the Ca<sup>2+</sup>-dependent and phosphatidic acid (PA)-dependent legs  
135 underlying microneme secretion (Bullen *et al.*, 2016) by titrating in A23187 Ca<sup>2+</sup>-  
136 ionophore and propranolol to activate diacylglycerol kinase 1 (DGK1) to raise the PA  
137 concentration, respectively. With neither treatment did we observe a difference in egress  
138 efficiency compared to the RH $\Delta$ ku80 parent line, suggesting that micronemes are  
139 secreted sufficiently to support egress (Fig 2C). We neither observed a difference in  
140 invasion efficiencies, indicating that secretion of the rhoptries is also not affected by the  
141 absence of PRP1 (Fig 2D). We more directly monitored rhoptry secretion by detecting  
142 phosphorylated STAT3 (P-STAT3) accumulating in in the nucleus of the infected host cell  
143 as STAT3 is phosphorylated by the rhoptry protein ROP16 (Saeij *et al.*, 2007). We did not  
144 observe a difference in accumulation of P-STAT3 between parent and  $\Delta$ PRP1 lines

145 supporting that rhoptries are secreted normally (Fig S2). Based on these results we  
146 conclude that PRP1 is not essential for the secretion of micronemes and rhoptries and is  
147 not required for completing the *Toxoplasma* lytic cycle *in vitro*.

148

#### 149 **Loss of PRP1 reduces Ca<sup>2+</sup>-induced microneme secretion**

150 To assess whether the absence of PRP1 more subtly affected signaling events leading to  
151 microneme secretion we used pharmacological triggers (secretagogues) acting on distinct  
152 steps in the signal transduction pathway. The current understanding of the signaling  
153 pathway is that protein kinase G (PKG) acts upstream of phosphoinositide phospholipase  
154 C (PI-PLC), which subsequently results in the formation of inositol triphosphate (IP<sub>3</sub>) and  
155 diacylglycerol (DAG) (Lourido & Moreno, 2015). Here the pathway bifurcates as IP<sub>3</sub> leads  
156 to the release of Ca<sup>2+</sup> from the endoplasmic reticulum, which is relayed by calcium-  
157 dependent protein kinases (CDPKs), whereas DAG is converted to PA, which is directly  
158 sensed by the micronemes to promote their secretion (Bullen *et al.*, 2016). We used  
159 zaprinast to activate PKG (Donald & Liberator, 2002, Lourido *et al.*, 2012), ethanol to  
160 trigger PI-PLC (Carruthers *et al.*, 1999), A23187 to mimic the high Ca<sup>2+</sup> trigger (Carruthers  
161 & Sibley, 1999, Lourido *et al.*, 2010), and propranolol to activate DGK1 which raises the  
162 PA concentration and engages the sensor APH (acylated pleckstrin-homology domain-  
163 containing protein) on the micronemes (Jacot *et al.*, 2016, Bullen *et al.*, 2016). High spikes  
164 in cytoplasmic Ca<sup>2+</sup> concentration have been reported to coincide with egress and  
165 invasion whereas an intermediate elevated cytoplasmic Ca<sup>2+</sup> concentration accompanies  
166 gliding motility between host cells (Sidik *et al.*, 2016a). Hence, we determined the level of  
167 so-called 'constitutive' microneme secretion in absence of pharmacological secretagogues  
168 measured over one hour, reflecting the basal level of microneme secretion during  
169 extracellular gliding (Wetzel *et al.*, 2004). Secretion was assessed through the release of  
170 proteolytically cleaved microneme protein, MIC2, in the supernatant of extracellular  
171 parasites. We observed robust constitutive secretion regardless of the presence or  
172 absence of PRP1 (Fig 3A). Even the activation of signaling events in the DAG leg of the  
173 pathway and further upstream (resulting from propranolol, ethanol, or zaprinast inductions)  
174 did not result in any dramatic change of MIC2 release, except for a minor but notable  
175 reduction of ethanol-triggered secretion in absence of PRP1. However, the ΔPRP1  
176 parasites were less responsive to the Ca<sup>2+</sup> branch of the signaling pathway triggered by  
177 Ca<sup>2+</sup> ionophore A23187, which sharply reduced the amount of released MIC2. Thus, the  
178 role of PRP1 in microneme secretion is exclusive to the Ca<sup>2+</sup>-dependent signal

179 transduction pathway and does not act on the PA-mediated branch contributing to  
180 microneme secretion.

181 To differentiate whether the loss of the high  $\text{Ca}^{2+}$  response is the result of an overall  
182 deficiency or of a reduced sensitivity we titrated the amount of A23187 in the microneme  
183 secretion assay (Fig 3B). Compared to wild type parasites that secrete MIC2 at A23187  
184 concentrations as low as 1.25  $\mu\text{M}$  and reached saturation at 2.5  $\mu\text{M}$ ,  $\Delta\text{PRP1}$  mutants  
185 never display any secretion even in presence of 5  $\mu\text{M}$  A23187. The defect in  $\Delta\text{PRP1}$   
186 parasites therefore appears to completely defective in their ability to respond to high  
187 spikes in  $\text{Ca}^{2+}$  concentration with microneme secretion.

188 The modest reduction in MIC2 secretion in absence of PRP1 using ethanol Fig 3A is  
189 not unsurprising since ethanol is not as powerful as the other secretagogues. Thus, this  
190 might highlight more subtle effects, especially since it acts at the bifurcation between  $\text{Ca}^{2+}$   
191 and PA pathways. The titration of ethanol does not reveal a detectable difference in  
192 sensitivity toward MIC2 secretion, however, it appeared in some experiments that the total  
193 MIC2 amount in  $\Delta\text{PRP1}$  parasites is slightly lower than in the control line (Fig S3). To  
194 determine whether the overall MIC2 content was different in  $\Delta\text{PRP1}$  parasites we probed  
195 a serial dilution series of total parasite lysate with MIC2 antibody and two loading controls,  
196 dense granule protein GRA1 and cytoskeleton protein IMC1 (Fig 3C). These data show  
197 that the overall MIC2 level remains unchanged upon loss of PRP1. Since PFUS in  
198 *Paramecium* has been show to affect secretory organelle formation (Liu et al., 2011), we  
199 reasoned that the possible mis-trafficking of the microneme proteins in the  $\Delta\text{PRP1}$   
200 mutants might also explain the secretion defect. We tested this, as well as trafficking to the  
201 other secretory organelles, by fluorescence imaging using MIC2 antibody alongside  
202 rhoptry and dense granule specific antisera as controls (Fig 3D). We observed no  
203 accumulations of MIC2 protein along the secretory pathway and the morphology of all  
204 secretory organelles, including the micronemes, was normal. Thus, the loss of PRP1 does  
205 not affect organellogenesis or protein trafficking to the micronemes, but results in the  
206 inability to enhance microneme secretion in response to high  $\text{Ca}^{2+}$  spikes.

207

### 208 **Where does PRP1 localize?**

209 PRP1 was previously shown to localize to the most apical micronemes, and to transition to  
210 the cytoplasm upon triggering microneme secretion with ethanol (Matthiesen et al., 2001,  
211 Matthiesen et al., 2003). We used our specific PRP1 antiserum in IFA analysis to confirm  
212 this observation. Using previously reported 4% paraformaldehyde (PFA) fixation we did

213 not observe any specific signal as the random spotty  $\alpha$ PRP1 pattern in wild type parasites  
214 looks identical to the signal observed in the  $\Delta$ PRP1 line (Fig 4A). This suggests that PFA  
215 fixation destroys the epitope(s) recognized by the antiserum. Presence of a single band of  
216 approximately 64 kDa, which is around the predicted size of 70 kDa, only in wild type  
217 parasites clearly indicates the high specificity of our antiserum (Fig 2B). To overcome this  
218 fixation artefact we used low temperature 100% methanol fixation and observed  
219 cytoplasmic localization of PRP1, both in intracellular and extracellular parasites (Fig 4A).  
220 Importantly, we did not observe any significant signal in  $\Delta$ PRP1 parasites under these  
221 conditions except for the background foci also evident with 4% PFA. Taken together, our  
222 antiserum is specific for PRP1 but the epitope(s) it recognizes are not preserved upon  
223 PFA fixation, which complicates direct comparison to previous reports (Matthiesen et al.,  
224 2001, Matthiesen et al., 2003).

225 To further elucidate the conflicting PRP1 localizations we tagged the endogenous  
226 locus at the C-terminus with a yellow fluorescent protein (gPRP1-YFP; Fig 5A, B). Live  
227 parasite imaging revealed a cortical YFP signal in combination with an extended apical  
228 spot in intracellular parasites, the latter of which was reduced in extracellular parasites  
229 (Fig 5C). Co-transfections targeting red fluorescent fusion proteins to the cortical IMC  
230 cytoskeleton (IMC1), rhoptries (TLN1) and micronemes (MIC8) showed that the cortical  
231 gPRP1-YFP signal colocalized with the IMC whereas the elongated apical signal in  
232 intracellular parasites overlays with the rhoptries (Fig 5D). Surprisingly, we observed no  
233 co-localization with the micronemes under any condition tested. We further used this YFP  
234 tagged PRP1 line to validate our  $\alpha$ PRP1 antiserum upon methanol and PFA fixation  
235 through co-staining with an  $\alpha$ GFP antiserum recognizing YFP. Consolidating our  
236 observations made in Fig 4, we observed a cytoplasmic PRP1 and GFP signal upon  
237 methanol fixation, but upon PFA fixation we lose the cytoplasmic PRP1 signal, which  
238 becomes spotty and does not overlay with the even GFP signal. Thus, PFA fixation indeed  
239 destroys the PRP1 epitope(s) recognized by our antiserum. Furthermore, methanol  
240 fixation disrupts the PRP1-YFP localization pattern observed in live parasites (Fig 5E).  
241 Since membrane associated proteins are notoriously challenging to fixate (e.g. (Hannah *et*  
242 *al.*, 1998)) we explored a variety of fixation conditions to test if the live localization could  
243 be conserved (Fig S4). Acetone fixation preserved the cortical signal to some extent, but  
244 the rhoptry signal is not preserved under any of the tested conditions. Finally, we wanted  
245 to ascertain that tagging the endogenous locus with YFP did not interfere with PRP1  
246 function. Therefore we performed the microneme secretion assay on the gPRP1-YFP line



247 and compared it directly with the parent line (RH $\Delta$ ku80) and the  $\Delta$ PRP1 line. We detect  
248 secreted MIC2 in the YFP tagged line comparable to the parent line, which indicates that  
249 PRP1 function is not impaired by the YFP tag (Fig 5F). Overall, our data indicate that all  
250 tested fixation conditions alter the PRP1 localization in the cell and that PFA destroys the  
251 epitope(s) recognized by our antiserum. We conclude that endogenously tagged PRP1 is  
252 functional and localizes to the IMC and rhoptries in intracellular parasites whereas the  
253 rhoptry signal is diminished in extracellular parasites. When we stimulated extracellular  
254 parasites with A23817 no further changes in localization were observed but we noted  
255 extrusion of the conoid suggesting other Ca<sup>2+</sup>-mediated events are executed normally  
256 (data not shown).

257 Since our live and fixed localizations both conflict with the previously reported  
258 microneme localization we further corroborated the membranous localization in live  
259 parasites by fractionating wild type parasites in membrane and cytosolic fractions by  
260 differential centrifugation (Fig 4B). We used CDPK1 as a cytosolic marker (Pomel *et al.*,  
261 2008) and MIC2 antiserum to probe for micronemal protein. These data show that PRP1 is  
262 present as both a soluble and membrane associated form but does not appear to co-  
263 fractionate with the micronemes (P1 in Fig 4B). Thus the fractionation data are consistent  
264 with the live microscopy observations of the endogenously YFP-tagged PRP1 protein.

265

### 266 **PGM2 also functions in microneme secretion**

267 To ensure that the phenotypic effects observed in the  $\Delta$ PRP1 mutants are specific to  
268 PRP1 deletion and not due to potential functional compensation by the PGM2 paralog we  
269 also deleted this gene. We replaced the *pgm2* locus with a drug resistance cassette  
270 mediated by a CRISPR/Cas9 induced double strand break, both in parent (RH $\Delta$ ku80) and  
271  $\Delta$ PRP1 parasites (Fig 6A-C). Plaque assays showed that both the single ( $\Delta$ PRP1 and  
272  $\Delta$ PGM2) as well as the double ( $\Delta$ PRP1 $\Delta$ PGM2) knock out lines were viable and did not  
273 show a dramatic change in plaque size or number (Fig 6D). To specifically understand the  
274 effect of deleting PGM2 and determine its role in microneme secretion, we performed  
275 secretion assays similar to those with  $\Delta$ PRP1 and the parental strain (Fig 6E). Surprisingly,  
276 both single deletion of PGM2 as well as double knockout of PRP1 and PGM2  
277 demonstrated microneme secretion defects as observed upon absence of only the PRP1  
278 gene: A23187 induced MIC2 secretion was either below or just at the detection limit in all  
279 the three mutants whereas there was a modest reduction in ethanol induced secretion. As  
280 for  $\Delta$ PGM2, constitutive MIC2 release or release upon zaprinast and propranolol triggers

281 was unchanged and comparable to the parent line. Thus, our data suggest that both PRP1  
282 and PGM2 act in the microneme secretion pathway, thereby eliminating putatively  
283 compensatory functions between the two proteins.

284 The shared phenotype between the  $\Delta$ PRP1 and  $\Delta$ PGM2 suggest that PRP1 and  
285 PGM2 interact functionally. Extending on this thought, they might associate with each  
286 other. Proteins within the alpha-D-phosphohexomutase superfamily to which the PGMs  
287 belong in general form dimers (e.g. *Paramecium* parafusin is a symmetric dimer: (Muller *et*  
288 *al.*, 2002)), whereas there is an example of a heterodimer of allelic variants (Andreotti *et*  
289 *al.*, 2015). As such we explored the possibility of PRP1/PGM2 heterodimers in  
290 *Toxoplasma* tachyzoites. To this end we generated a parasite line expressing a tandem  
291 Myc epitope fusion of PGM2 (Myc2-PGM2) and performed a co-immunoprecipitation with  
292 Myc-recognizing 9E10 antibodies and probed with our PRP1 specific antiserum. We  
293 readily pulled down the Myc2-PGM2 in this assay, however we were unable to detect  
294 PRP1 in the same fraction (Fig 7). These data suggest that PRP1 and PGM2 do not  
295 physically interact with each other.

296

### 297 **Neither PRP1 nor PGM2 are required for energy metabolism and acute virulence**

298 Besides the effect on microneme secretion it came somewhat as a surprise that the PRP1  
299 and PGM2 double KO strains were viable, without an apparent effect on glycolysis  
300 (Fig 6D). Furthermore, a direct *in vitro* comparison of the enzymatic efficiency of both  
301 paralogs indicated that PRP displayed a 4-fold greater enzymatic activity than PGM2  
302 (Imada *et al.*, 2010), which is also counter intuitive. Although the dispensability of essential  
303 glycolytic enzymes in *Toxoplasma* has been reported, such parasites have significant  
304 fitness defects and typically require glutamine complementation (Shen & Sibley, 2014,  
305 MacRae *et al.*, 2012, Blume *et al.*, 2009, Dubey *et al.*, 2016, Nitzsche *et al.*, 2016).  
306 However, the knock down of PGM in *Saccharomyces cerevisiae* (Fu *et al.*, 2000) or  
307 depletion of the single PGM (PFUS) in *Paramecium* and *Tetrahymena* (Liu *et al.*, 2011,  
308 Chilcoat & Turkewitz, 1997) demonstrated no apparent effect on the growth of these  
309 organisms, and there are organisms without a dedicated PGM such as *Trypanosoma*  
310 *brucei* (Bandini *et al.*, 2012). In addition, we showed that the PFUS-related PGM orthologs  
311 vs. the exclusive PGM enzymes are not at all uniformly conserved across the  
312 Apicomplexa (Fig 1), which further supporting the notion that these proteins display  
313 plasticity in these organisms. Therefore, we asked if loss of either one or both PGM  
314 orthologs in *Toxoplasma* had an effect on metabolism by assessing the ATP level in the

315 knock-out mutants we generated. As shown in Fig 8A, no changes in ATP levels were  
316 observed in the different mutants compared to the wild type parent line. These data  
317 suggest that the *Toxoplasma* metabolism shares characteristics with the organisms where  
318 PGM is dispensable and we conclude that PGM activity is not required for the *Toxoplasma*  
319 lytic cycle.

320 Across the metabolic and  $\text{Ca}^{2+}$ -dependent exocytosis functions of the PGM orthologs  
321 in *Toxoplasma* we observe a role in microneme secretion but no effect on plaque forming  
322 capacity of tachyzoite *in vitro*. However, it is possible that either function is only  
323 prominently required for animal infection, where the environment is much more complex.  
324 Germane to this point,  $\text{Ca}^{2+}$  is known to be critical for virulence and egress to escape the  
325 innate immune response during acute mice infection (Tomita *et al.*, 2009). It is conceivable  
326 that this escape response needs to be fast and could rely on high spikes of intracellular  
327  $\text{Ca}^{2+}$ . To test this model we assessed the acute virulence of the  $\Delta\text{PRP1}$  and  
328  $\Delta\text{PRP1}\Delta\text{PGM2}$  mutants through mice infections. We observed no difference in the  
329 development of the infections between either mutant or compared to the RH $\Delta\text{ku80}$  parent  
330 line (Fig 8B). Weight loss patterns were comparable for all infected mice and all mice  
331 either died or needed euthanasia on day 8 post infection. Thus, these data indicate that  
332 the PGM orthologs are not only dispensable *in vitro*, but also *in vivo* during an acute  
333 infection.

334

335

### 336 Discussion

337  $\text{Ca}^{2+}$ -mediated exocytosis is a key event required for successful host cell invasion of  
338 apicomplexan parasites. *Toxoplasma* PRP1 was associated with this process based on  
339 localization studies in *Toxoplasma* and heterologous functional studies in the ciliate  
340 *Paramecium* (Matthiesen *et al.*, 2003). Here we directly assessed the role of PRP1 in  
341 *Toxoplasma* by deleting the gene from the parasite, which surprisingly resulted in a non-  
342 lethal phenotype both *in vitro* and *in vivo* (Fig 2, 8B). We did, however identify a defect in  
343 the release of micronemes triggered by elevated  $\text{Ca}^{2+}$  concentrations. Interestingly, our  
344 detailed analysis of the PRP1 deletion mutant revealed that the morphology of the  
345 secretory organelles and cytoskeletal inner membrane complex appear normal in the  
346  $\Delta\text{PRP1}$  line (Fig 3D, 4A). Furthermore, we demonstrated that invasion and egress  
347 efficiency, which are both reliant on successful  $\text{Ca}^{2+}$ -mediated exocytosis, are independent  
348 of PRP1 (Fig 2C,D).

349 Since PRP1 was hypothesized to play a role in microneme secretion we determined  
350 the dynamics of *in vitro* microneme secretion under different conditions and stimulations.  
351 Our work demonstrates for the first time that deletion of PRP1 only affects microneme  
352 secretion bursts triggered by a high  $\text{Ca}^{2+}$  concentration through stimulation with the  $\text{Ca}^{2+}$ -  
353 ionophore A23187 (Fig 3A). Titration of A23187 demonstrated that the loss of PRP1  
354 completely disrupts the secretion boost in response to high  $\text{Ca}^{2+}$  and is not lowering the  
355 amplification of this high  $\text{Ca}^{2+}$  secretion response by lowering the general sensitivity to  
356  $\text{Ca}^{2+}$  (Fig 3B). Overall, these data indicate that PRP1 is essential to translate a high  $\text{Ca}^{2+}$   
357 trigger into enhanced microneme secretion. Spikes in intracellular  $\text{Ca}^{2+}$  are known to occur  
358 during invasion and egress (Sidik et al., 2016a, Wetzel et al., 2004), which correlate with  
359 increased levels of microneme secretion. However, since we observe no fitness loss of the  
360  $\Delta\text{PRP1}$  line the physiological function of these spikes in microneme secretion is currently  
361 not clear.  $\Delta\text{PRP1}$  have microneme secretion levels compared to the wild type under  
362 constitutive secretion in the extracellular environment, in absence of pharmacological  
363 stimuli. Our data therefore suggest that a basal level of microneme secretion is sufficient  
364 to complete the lytic cycle of the parasite. It is possible that the absence of PRP1 has  
365 certain cell biological effects such as changes in gliding motility patterns as observed in  
366 other mutants. In addition, we cannot exclude that the ability to respond to high  $\text{Ca}^{2+}$  fluxes  
367 with a microneme secretion response might be critical during other developmental stages  
368 of the parasite.

369 The PRP1 mutant allowed us to dissect the contribution of different branches of the  
370 signal transduction to microneme secretion through stimulation with targeted  
371 pharmacological secretagogues. Upstream stimulation of the pathway with PKG-activating  
372 zaprinast leads to robust microneme secretion. In *Plasmodium* numerous protein  
373 substrates have been described as PKG substrates (Brochet et al., 2014), which likely  
374 have many parallels in *Toxoplasma*. In addition, PKG activity generates  
375 phosphatidylinositol 4,5-bisphosphate ( $\text{PI}_{(4,5)}\text{P}_2$ ) through the phosphorylation of  
376 phosphatidylinositol (PI) and was shown to be a key event in *Plasmodium* secretion  
377 (Brochet et al., 2014).  $\text{PI}_{(4,5)}\text{P}_2$  is the substrate for PI-PLC, which in turn forms  $\text{IP}_3$  and  
378 DAG.  $\text{IP}_3$  is associated with inducing the  $\text{Ca}^{2+}$  spike resulting in microneme secretion  
379 (Lovett et al., 2002, Sidik et al., 2016b), whereas DAG is converted in PA, which is directly  
380 sensed by the micronemes to promote their secretion (Bullen et al., 2016). In contrast to  
381 PKG stimulation, PI-PLC activation by ethanol results in mildly reduced secretion in  
382 absence of PRP1 (Fig 3A). These results show that the phosphorylation of PI by PKG is a

383 major, but not the only requirement for a complete microneme secretion response, thereby  
384 implying the presence of other contributing PKG substrates. Excluding the contribution of  
385 the Ca<sup>2+</sup>-mediated branch by specifically triggering PA production through propranolol  
386 stimulation releases all brakes on microneme secretion (Bullen et al., 2016) and leads to a  
387 higher secretion than PKG stimulation regardless of the presence of PRP1. This indicates  
388 that very high PA levels override the requirement of substrates other than PI for PKG.  
389 Thus, our work provides evidence for PKG substrates other than PI contributing to the  
390 microneme secretion response. In ciliates PFUS is phosphorylated by casein kinase II  
391 (CKII) and PKG (Kusmann *et al.*, 1999) while during exocytosis the protein undergoes  
392 dephosphorylation by the protein phosphatase calcineurin (CN) (Plattner & Kissmehl,  
393 2005, Treptau *et al.*, 1995, Subramanian & Satir, 1992, Kissmehl *et al.*, 1996). The  
394 dephosphorylation results in dissociation of PFUS from the ciliate secreting vesicles while  
395 the released PFUS re-associates with nascent vesicles upon phosphorylation. It is  
396 conceivable that PRP1 phosphorylation by PKG is required for microneme secretion, but  
397 our data on *Toxoplasma* CN demonstrate this is not the key activity of CN as microneme  
398 secretion remains unaffected upon CN depletion (Paul *et al.*, 2015). The *Toxoplasma*  
399 phosphoproteome validated two phosphorylation sites in PRP1, Thr156 and Ser158, and  
400 the phosphorylation of the orthologous residues Thr156 and Ser158 in PGM2. However,  
401 the phosphorylation of these residues is universal requirement for enzymatic activity in  
402 phosphohexomutase family proteins (Bandini et al., 2012), and hence are unlikely to be  
403 connected to regulation of Ca<sup>2+</sup>-dependent exocytosis. Amongst the other detected  
404 phosphorylation sites in PFUS with reasonable confidence, four are conserved in PRP1.  
405 Additional work is needed to establish a possible connection of these putative  
406 phosphorylation with exocytosis.

407 Through the use of a peptide antibody against PFUS, which cross-reacts with PRP1,  
408 the latter was reported to localize to the most apical micronemes from which it releases in  
409 a phosphorylation state dependent fashion upon secretion (Matthiesen et al., 2001). In this  
410 model, PRP1 prevents simultaneous secretion of all micronemes in a parasite, which  
411 would be detrimental as a dosed release of micronemes is required to support prolonged  
412 gliding for crossing biological barriers while reserving micronemes needed for successful  
413 host cell invasion. However, the observed secretion dynamics of the PRP1 deletion  
414 mutant are inconsistent with this model. Moreover, our localization data also conflict with  
415 these previous results as the endogenously fused YFP associates with the IMC and  
416 rhoptries (Fig 5). Although highly specific in western blots, unfortunately our PRP1

417 antiserum was incompatible with IFA fixation methods, thereby restraining us from  
418 performing the same experiments (Fig 2, 4B, 7). Membrane associated proteins are  
419 notoriously challenging to localize sub-cellularly due to fixation artefacts (Hannah et al.,  
420 1998) which is mirrored by our experience. However, we were able to confirm that PRP1  
421 is present in soluble and membrane associated forms in extracellular parasites, which is  
422 consistent with the previously presented model (Liu *et al.*, 2009). In our opinion, the YFP-  
423 fusion data are the best reflection of the natural PRP1 localization, however, how the IMC  
424 and rhoptry localization of PRP1 relate to its role in microneme secretion is presently  
425 unclear.

426 To ensure that the phenotypic effects observed in the  $\Delta$ PRP1 mutants are specific to  
427 PRP1 deletion and not due to potential functional compensation by the PGM2 paralog we  
428 also removed this gene and even made a double knock out mutant (Fig 6). The  
429 observation that deletion of either one or both PGM genes simultaneously results in the  
430 same microneme secretion defect upon high  $Ca^{2+}$  flux sheds a completely new light on the  
431 specific role of PRP1 in  $Ca^{2+}$  signaling: PRP1 is not exclusive in this function as it extends  
432 to the other PGM expressed in *Toxoplasma*. This observation might explain why the  
433 conservation of either ortholog in the various Apicomplexa is a mishmash (Fig 1) as either  
434 ortholog could function in  $Ca^{2+}$ -dependent secretion. However, that individual gene  
435 deletions in *Toxoplasma* resulted in the same phenotype suggests a functional interaction  
436 between PRP1 and PGM2, which suggest a likely selective evolutionary pressure on  
437 preserving both. By co-IP we did not detect a physical interaction (Fig 7). Alternatively, the  
438 interaction might be transient upon high  $Ca^{2+}$ , which is much harder to capture.

439 In addition, our data show that *Toxoplasma* tachyzoites can survive without dedicated  
440 phosphoglucomutase. Since PGMs function in glycolysis this absence was expected to  
441 affect energy production, however we did not detect a change in ATP level in parasites  
442 without PGM (Fig 8A). Similar observations have been made in yeast (Hofmann *et al.*,  
443 1994, Boles *et al.*, 1994). Moreover, other organisms such as *Trypanosoma brucei* do not  
444 have a dedicated PGM enzyme at all (Bandini et al., 2012). In these and other systems it  
445 has been established that related enzymes in the alpha-D-phosphohexomutase  
446 superfamily also have phosphoglucomutase activity, such as phosphomannomutase  
447 (PMM) and phospho N-acetylglucosaminemutase (PAGM). Indeed *Toxoplasma* encodes a  
448 PMM (TGME49\_239710) and a PAGM (TGME49\_264650) and the amino acids involved  
449 in sugar binding are conserved between the *Toxoplasma* and the *T. brucei* PMM (Bandini  
450 et al., 2012). These insights therefore explain why the deletion of both *Toxoplasma* PGMs

451 has no effect on energy production.

452 In conclusion, we show that PRP1 is partially membrane associated and functions in  
453 translating a spike in  $Ca^{2+}$  into a burst of microneme secretion. The PRP1 line also  
454 confirmed the bifurcation in the  $Ca^{2+}$  and PA mediated control of microneme secretion  
455 downstream of PI-PLC activity. The constitutive level of microneme secretion is  
456 independent of PRP1 and sufficient to support the parasite through all steps of the lytic  
457 cycle both *in vitro* and *in vivo*. Interestingly, neither *Toxoplasma* PGM paralog is required  
458 for glycolysis whereas deletion of either gene results in loss of the microneme secretion  
459 burst. Considering our data in context of the mosaic pattern of PGM ortholog conservation  
460 across the Apicomplexa, our data suggests that either PGM gene could function in  
461 controlling the secretory response upon spikes in  $Ca^{2+}$ , which indicates this control  
462 mechanism could be more wide spread than initially suspected.

463

464

## 465 **Material and Methods**

466

### 467 **Parasites and host cells**

468 *Toxoplasma* tachyzoites were maintained in human foreskin fibroblasts (HFF) as  
469 previously described (Roos *et al.*, 1994). The host cells were maintained in DMEM media  
470 containing 10% serum. *Toxoplasma* strain RH $\Delta$ ku80 $\Delta$ HX (Huynh & Carruthers, 2009) was  
471 used as the basis for all mutants in this study. Stable transgenics were obtained by  
472 selection under 1  $\mu$ M pyrimethamine, 25  $\mu$ g/ml mycophenolic acid (MPA) combined with  
473 50  $\mu$ g/ml xanthine or 20  $\mu$ M chloramphenicol and cloned by limiting dilution.

474

### 475 **Plasmids**

476 All primer sequences are provided in supplementary table S1. For tagging the  
477 endogenous PRP1, 1.5 kb genomic DNA upstream of stop codon was PCR amplified  
478 using primer pair PRP1-LIC-F/R and cloned by ligation independent cloning into plasmid  
479 pYFP-LIC-DHFR (kindly provided by Vern Carruthers, University of Michigan) (Huynh &  
480 Carruthers, 2009). The plasmid was linearized with *Nco*I prior transfection.

481 For the generation of  $\Delta$ PRP1 plasmid, we deleted the LoxP flanked tubulin promoter  
482 and YFP cassette from the p5RT70-loxP-KillerRed-loxP-YFP/HX plasmid ((Andenmatten  
483 *et al.*, 2012), kindly provided by Markus Meissner, University of Glasgow) by *Apal*/*Not*I  
484 digestion, blunting the ends and re-ligation. The 2 kb flanks for double homologous

485 recombination (HR) were PCR amplified from RH $\Delta$ HX genomic DNA using primer pairs  
486 5'PRP1-KpnI-F/R for the 5' flank located 1.3 kb upstream of the ATG start codon and  
487 3'PRP-SacI-F/R for the 3' flank downstream of translation stop. The 5'-flank was inserted  
488 into p5RT70--/HX using *KpnI* and independently the 3'flank was inserted separately in  
489 parallel into p5RT70--/HX using *SacI*; the two plasmids were conjoined using *Scal/NotI* to  
490 make the final double homologous recombination plasmid. The plasmid was linearized  
491 with *Scal* prior to transfection.

492 Plasmid ptub-Myc2-PGM2/sagCAT was cloned by PCR amplifying the PGM2 CDS  
493 from cDNA using primer pair PGM2-AvrII-F and PGM2-EcoRV-R and was cloned by  
494 *AvrII/EcoRV* digestion into the ptub-Myc2-GAPDH1/CAT (Dubey et al., 2016).

495

#### 496 **Generation of PGM2 knockout**

497 To generate  $\Delta$ PGM2 parasite, two CRISPR/Cas9 plasmids targeting Cas9 to the *pgm2*  
498 genomic locus were designed using the primer pairs 5PGM2-dKO-s/as and 3PGM2-dKO-  
499 s/as respectively upstream of AUG and downstream of stop codon. Specificity of the guide  
500 RNA was tested as previously published (Sidik *et al.*, 2014). DHFR drug selectable  
501 cassette along with 20 nt of homologous region flanking each end which corresponds to  
502 upstream and downstream of the genomic locus was PCR amplified. 40  $\mu$ g of each pU6-  
503 5'PGM2/3'PGM2-Cas9 plasmid was co-transfected with 40  $\mu$ g of the PCR product into  
504 RH $\Delta$ Ku80 $\Delta$ HX or RH $\Delta$ Ku80 $\Delta$ HX $\Delta$ PRP1 parasites to generate  $\Delta$ PGM2.

505

#### 506 **Immunofluorescence assays and live fluorescence microscopy**

507 Live microscopy was performed on intracellular parasites grown overnight in 6-well plate  
508 containing coverslips confluent with HFF cells. For extracellular localization, freshly lysed  
509 parasites were filtered, pelleted and resuspended in PBS. Thereafter, parasites were  
510 added to poly-L-lysine coated cover-slips and allowed to incubate for 30 minutes at 4°C  
511 prior to imaging. Co-localization studies in live gPRP1-YFP parasites was performed  
512 following transient co-transfection with the following plasmids: tub-  
513 IMC1mCherryRFP/sagCAT (Anderson-White *et al.*, 2011); TLN1(1-58)mCherryRFP/HPT  
514 (rhostry marker) (Hajagos *et al.*, 2012) (kindly provided by Peter Bradley, UCLA);  
515 pTgMIC8-TgMIC8mycmCherryFP-nosel (pG53) (Kessler *et al.*, 2008) (kindly provided by  
516 Markus Meissner, University of Glasgow).

517 Indirect immunofluorescence assay was performed on intracellular parasites grown  
518 overnight in 6-well plate containing coverslips confluent with HFF cells fixed with 100%



519 methanol (unless stated otherwise) using the following primary antisera: rabbit  $\alpha$ GFP  
520 (1:500) (Torrey Pines Biolabs),  $\alpha$ -MIC2 MAb 6D10 (1:8,000; kindly provided by David  
521 Sibley, Washington University in St. Louis (Wan *et al.*, 1997)), rabbit  $\alpha$ -MIC2 (1:8,000;  
522 kindly provided by David Sibley, Washington University in St. Louis) (Labruyere *et al.*,  
523 1999), mouse  $\alpha$ -ROP1 (1:1,000; kindly provided by Peter Bradley, UCLA (Saffer *et al.*,  
524 1992)),  $\alpha$ -GRA1 (1:20,000; kindly provided by Marie-France Cesbron-Delauw, Université  
525 Grenoble, France (Cesbron-Delauw *et al.*, 1989)), rat  $\alpha$ -IMC3 (1:2,000 (Anderson-White *et*  
526 *al.*, 2011)), and guinea pig  $\alpha$ -PRP1 (1:1,000). Alexa 488 (A488) or A594 conjugated goat  
527  $\alpha$ -mouse,  $\alpha$ -rabbit,  $\alpha$ -rat, or  $\alpha$ -guinea pig were used as secondary antibodies (1:500,  
528 Invitrogen). DNA was stained with 4',6-diamidino-2-phenylindole (DAPI). Fixation and  
529 staining of P-STAT3 (1:120; #9145P Cell Signaling) was performed exactly as described  
530 in (Brown *et al.*, 2014). A Zeiss Axiovert 200 M wide-field fluorescence microscope  
531 equipped with a  $\alpha$ -Plan-Fluar 100x/1.3 NA and 100x/1.45 NA oil objectives and a  
532 Hamamatsu C4742-95 CCD camera was used to collect images, which were deconvolved  
533 and adjusted for phase contrast using Volocity software (Improvision/Perkin Elmer).

534 For testing the different fixatives and the fixation conditions for PRP1 localization,  
535 100% acetone; 4% paraformaldehyde (PFA); 100% methanol and 2.5% formaldehyde and  
536 0.05% glutaraldehyde at -20°C, 4°C or room temperature were tested.

537

### 538 **Generation of specific PRP1 antiserum**

539 To generate N-terminal His<sub>6</sub> tagged fusion protein, 580 bp from the cDNA of PRP1  
540 (corresponding to amino acids: 446 to 637 in the C-terminal region of the protein) were  
541 PCR amplified using the primers aPRP1-LIC-F/R and cloned into the pAVA0421 plasmid  
542 using LIC (Alexandrov *et al.*, 2004). The fusion protein was expressed in BL21 *Escherichia*  
543 *coli* using 1 mM IPTG for overnight at 37°C and purified under denaturing condition over  
544 Ni-NTA Agarose (Invitrogen). Polyclonal antiserum was generated by immunization of  
545 guinea pig (Covance, Denver, PA).

546

### 547 **Western blotting**

548 Following SDS PAGE, PVDF membrane blots were probed with mouse  $\alpha$ -IMC1 (1:2,000,  
549 kindly provided by Gary Ward, University of Vermont), guinea pig  $\alpha$ -PRP1 (1:10,000),  
550 mouse monoclonal  $\alpha$ -GRA1 (1:20,000), or CDPK1 nanobody (1  $\mu$ g/ml, a kind gift of Dr.  
551 Sebastian Lourido, Whitehead Institute (Ingram *et al.*, 2015)) followed by probing with  
552 horse radish peroxidase (HRP)-conjugated  $\alpha$ -mouse (1:10,000),  $\alpha$ -guinea-pig antibody

553 (1:3,000, Santa-Cruz Biotech), or in case of the nanobody,  $\alpha$ -penta-His antibody  
554 (1:10,000; Qiagen) and detection of signal by chemiluminescent HRP substrate (Millipore).  
555

### 556 **Fractionation**

557 Sub-cellular fractionation was performed as described previously (Dubey et al., 2016).  
558 Essentially, extracellular parasites were lysed by 5 min freezing of the pellet in liquid  
559 nitrogen and resuspension at 37°C in hypotonic buffer (10 mM Tris pH 7.8 and 5 mM  
560 NaCl) followed by additional lyses by 40 douncer strokes. The lysate was centrifuged at  
561 low speed (1000g for 15 min). The pellet was resuspended in an equal volume of  
562 resuspension buffer (100 mM Tris pH 7.8 and 150 mM NaCl) and centrifuged at high  
563 speed (100,000g for 60 min). For SDS PAGE pellets were resuspended in an equal  
564 volume of SDS-PAGE loading buffer and corresponding amounts analyzed by western  
565 blotting.

566

### 567 **Plaque assay**

568 T12.5 culture flasks or 6-well plates confluent with HFF cells were inoculated with 100  
569 parasites of choice and grown for 7 days. Following incubation, the monolayer was fixed  
570 with 100% ethanol for 10 min and stained with crystal violet (Roos et al., 1994). Plaque  
571 sizes were quantitated using ImageJ-win32 software (Abramoff, 2004).

572

### 573 **Microneme secretion assay**

574 Microneme secretion assays using the MIC2 was performed as published (Carruthers &  
575 Sibley, 1999). Briefly, freshly lysed parasites were pelleted, washed and resuspended to  
576  $2 \times 10^8$ /ml parasites in DMEM/FBS (DMEM containing 20 mM HEPES, pH 7.0 and 3% (w/v)  
577 FBS).  $2 \times 10^7$  parasites were added to each well of a 96-well plate and secretion was  
578 induced by the following secretagogues: 1.25  $\mu$ M A23187, 0.25%(v/v) ethanol, 500  $\mu$ M  
579 zaprinast, 500  $\mu$ M propranolol or DMSO control for five minutes at 37°C, unless  
580 concentrations are specifically indicated otherwise. For constitutive microneme secretion,  
581 we incubated parasites at 37°C for 60 minutes in absence of secretagogue. Microneme  
582 secretion was assessed in the supernatant with mouse monoclonal  $\alpha$ -MIC2 6D10  
583 (1:8,000).  $Ca^{2+}$ -independent constitutive secretion of the dense granules was determined  
584 using mouse monoclonal  $\alpha$ -GRA1 (1:20,000) or rabbit  $\alpha$ -GRA2 antiserum (1:10,000).

585

### 586 **Invasion assay**

587 The red-green invasion assay was performed as previously published (Farrell *et al.*, 2012,  
588 Kafsack *et al.*, 2004) with modifications.  $2.5\text{-}3 \times 10^5$  tachyzoites were added to host cells  
589 grown in 96-well black/optical bottom plates, centrifuged (500 rpm, three minutes, RT) and  
590 allowed to invade for one hour at 37°C. Non-invading extracellular parasites were detected  
591 using A594 conjugated  $\alpha$ -SAG1/P30-T41E5 antibodies (1:500; kindly provided by Dr. Jean  
592 François Dubremetz, University of Montpellier, France (Couvreur *et al.*, 1988)) or  $\alpha$ -SAG1  
593 MAb DG52 (kindly provided by Dr. Jeroen Saeij, Massachusetts Institute of Technology  
594 (Burg *et al.*, 1988)). Following 16% formaldehyde/8% glutaraldehyde fixation and  
595 permeabilization using 0.25% Triton X-100, the parasites with incubated with A488  
596 conjugated  $\alpha$ -SAG1/P30 antibody to visualize both invaded and non-invaded parasites.  
597 The antibody incubations were each followed by three washes with HH buffer (Hank's  
598 Balanced Salt Solution containing 1 mM HEPES, pH 7.0). Cytochalasin D treated wild type  
599 parasites were used as negative control. Images were taken using EVOS® FL Cell  
600 Imaging System (Life Technologies).

601

#### 602 **Egress assay**

603 Egress assay was performed as described previously (Farrell *et al.*, 2012, Eidell *et al.*,  
604 2010). 6-well plates containing coverslips confluent with HFF cells were infected with  
605  $6 \times 10^4$  RH $\Delta$ ku80 or  $\Delta$ PRP1 parasites expressing cytoplasmic YFP (Gubbels *et al.*, 2003)  
606 and grown for 30-35 hrs. Egress was triggered by treatment with A23187 or propranolol at  
607 concentration as indicated using DMSO as control at 37°C for five minutes, followed by  
608 100% methanol fixation for 10 minutes at RT. Intact vacuoles were counted in at least 10  
609 fields in two independent experiments.

610

#### 611 **ATP concentration measurement**

612 The CellTiter-Glo Luminescent Cell Viability Assay (Promega; Madison, WI) was used  
613 following the manufacturer's protocol. Intracellular parasites grown for 18 hrs were  
614 harvested and resuspended in phenol red free ED1 medium to  $10^7$  parasites/ml. 100  $\mu$ l of  
615 parasites were added to a 96 well plate and equilibrated and an equal volume of CellTiter-  
616 Glo reagent was added. The plate was shaken for 2 min to allow cell lysis and then  
617 incubated at room temperature for 30 min prior to luminescence reading on an M5 plate  
618 reader (Molecular Dynamics) set at an integration time of 500 ms. An ATP (disodium salt)  
619 dilution series was used to generate a standard curve.

620

621 **Co-immunoprecipitation**

622 Co-immunoprecipitation basically followed published procedures (Suvorova *et al.*, 2013).  
623 Briefly, extracellular parasite pellets were subjected to one freeze-thaw cycle and lysed in  
624 lysis buffer (1xPBS, 0.25% NP40, 400 mM NaCl, 250 U/ml benzonase (Novagen),  
625 mammalian protease inhibitor cocktail (Sigma)). Lysates were pre-cleared on ProteinG-  
626 magnetic beads (New England Biolabs) followed by Myc-tagged protein complex capture  
627 on 9E10 monoclonal antibody conjugated magnetic beads (MBL). Beads were washed  
628 with three times with lysis buffer and bound proteins eluted in Laemmli buffer.

629

630 ***In vivo* mouse infection studies**

631 Groups of three C57BL/6J mice with a weight between 18-20 g were infected  
632 intraperitoneally with 1,000 tachyzoites of the RH $\Delta$ ku80,  $\Delta$ PRP1 or  $\Delta$ PRP1 $\Delta$ PGM2 strains.  
633 Following infection mice were monitored daily for posture, activity level and weight.

634

635 **Sequence analysis and phylogeny**

636 Phylogeny was performed using Geneious (Kearse *et al.*, 2012) and unrooted trees were  
637 plotted using the neighbor-joining algorithm.

638

639

640 **Acknowledgements**

641 We thank Dr. Jayme Henzy for assistance with phylogeny and Drs. Giulia Bandini and  
642 Sebastian Lourido for insightful discussions. We thank Drs. Peter Bradley, Marie-France  
643 Cesbron-Delauw, Jean-François Dubremetz, Sebastian Lourido, Markus Meissner, Jeroen  
644 Saeij, David Sibley and Gary Ward for reagents. This work was supported by NIH  
645 AI108251 (BIC), AI099658 (MJG), AI122923 (MJG), GM084383 (IJB), AI069986 (IJB) and  
646 American Cancer Society RSG-12-175-01-MPC (MJG) grants.

647

648

649 **Additional information**

650 The authors state no competing financial interests.

651 **Legend to Figures**

652

653 **Figure 1: Phylogeny of PGMs in the Apicomplexa and their relatives.**

654 Unrooted tree based on alignment of the following sequences: *Toxoplasma gondii*:

655 TGME49\_285980 (TgPGM1), TGME49\_318580 (TgPGM2); *Neospora caninum*:

656 A0A0F7UAD1 (PGM1: NCLIV\_014450 has wrong first exon), NCLIV\_010960 (NcPGM2),

657 *Hammondia hammondi*: HHA\_285980 (HhGPM1), HHA\_318580 (HhGPM2); *Sarcocystis*

658 *neurona*: SN3\_00900660 (SnPGM1), SN3\_01700255 (SnPGM2); *Eimeria maxima*:

659 EMWEY\_00024400 (EmPGM1); *Eimeria praecox*: EPH\_0036200 (EpPGM1); *Eimeria*

660 *falciformis*: EfaB\_MINUS\_40637.g2669\_1 (EfPGM1); *Eimeria tenella*: ETH\_00002785

661 (EtPGM1); *Eimeria necatrix*: ENH\_00082780 (EnPGM1); *Eimeria brunetti*: EBH\_0076610

662 (EbPGM1); *Plasmodium falciparum*: PF3D7\_1012500 (PfGGM2); *Plasmodium reichenowi*:

663 PRCDC\_1011900 (PrGGM2); *Plasmodium chabaudi*: PCHAS\_1211600 (PcPGM2);

664 *Plasmodium berghei*: PBANKA\_1210900 (PbPGM2); *Plasmodium yoelii*: PY17X\_1214100

665 (PyPGM2); *Plasmodium knowlesi*: PKNH\_0812300 (PkPGM2); *Plasmodium vivax*:

666 PVX\_094845 (PvPGM2); *Gregarina niphandrodes*: GNI\_111250(GnPGM1);

667 *Cryptosporidium parvum*: cgd2\_3270 (CpPGM1.1), cgd2\_3260 (CpPGM1.2);

668 *Cryptosporidium muris*: CMU\_003300 (CmPGM1.1), CMU\_003310 (CmPGM1.2);

669 *Cryptosporidium hominis*: Chro.20343 (ChPGM1); *Chromera velia*: Cvel\_11076

670 (CvPGM1), Cvel\_22350 (CvPGM2); *Vitrella brassicaformis*: Vbra\_3443 (VbPGM1),

671 Vbra\_19870 (VbPGM2). *Paramecium tetraurelia*: 1KFI\_A (PtGPGM1); *Tetrahymena*

672 *thermophile*: AAB97159.1 (TtPGM1); *Saccharomyces cerevisiae*: CAA89741.1 (ScPGM1);

673 *Homo sapiens*: AAA60080.1 (HsPGM1). Branch colors reflect species relation with the

674 cyst forming coccidia in red, non-cyst forming coccidia in orange, *Plasmodium* spp. in

675 purple, *Cryptosporidium* spp. in light blue, gregarines in medium blue, ciliates in dark blue

676 and the chromerids in green.

677

678 **Figure 2. PRP1 antiserum validation and global phenotype analysis of  $\Delta$ PRP1**

679 **parasites.**

680 **A.** Parental (RH $\Delta$ ku80),  $\Delta$ PRP1 and endogenously YFP-tagged PRP1 (gPRP1-YFP)

681 parasites were lysed and analyzed in a western blot using  $\alpha$ -PRP1 antibody. The 27 kDa

682 shift in the molecular weight resulting from the YFP tag can be observed in gPRP1-YFP

683 lysate. rPRP1<sup>446-637</sup> represents the His6-tagged recombinant protein used to generate the

684  $\alpha$ PRP1 antiserum.  $\alpha$ -tubulin antibody was used as loading control of the parasite lysate.

685 **B.** Bottom: Representative image of plaque assay performed with  $\Delta$ PRP1 and parental  
686 RH $\Delta$ ku80 parasites grown undisturbed on a host cell monolayer for seven days.

687 Top: Quantification of the plaque size following digital scanning of the plaque assays. A.U.  
688 arbitrary units. Counted 30 plaques per sample, n=4. Mean  $\pm$  s.e.m.; two-tailed *t*-test: [\*\*],  
689 *P* <0.001.

690 **C.**  $\Delta$ PRP1 and parent parasites were triggered to egress by the Ca<sup>2+</sup> ionophore A23187 or  
691 propranolol to activate DGK1 and raise the PA concentration for five minutes at 37°C. For  
692 all samples, egress following stimulation is expressed as the percent egressed vacuoles of  
693 the total vacuoles observed. n=3; mean  $\pm$ s.d.

694 **D.** The invasion efficiency was assessed using the red-green assay with freshly lysed  
695  $\Delta$ PRP1 and parental RH $\Delta$ ku80 parasites. Total numbers of intracellular and extracellular  
696 parasites per microscopy field were counted and the intracellular parasites expressed  
697 relative to the total parasite. At least 150 parasites from three random fields per sample  
698 were scored. n=3; mean +s.d.

699

700 **Figure 3. Absence of PRP1 disrupts high Ca<sup>2+</sup>-trigger induced microneme secretion**  
701 **in tachyzoites.**

702 **A.** Representative western blot image of the microneme secretion assay performed with  
703  $\Delta$ PRP1 and parent parasites. The secretion of the microneme protein MIC2 was used as  
704 the marker. 20% represents the non-secreted total protein lysate from 20% of the total  
705 parasites used in the secretion assay. Extracellular tachyzoites were treated with  
706 0.25%(v/v) ethanol, 1.25  $\mu$ M A23187, 500  $\mu$ M zaprinast (zapr), 500  $\mu$ M propranolol (prop)  
707 or DMSO as control for five minutes at 37°C. For constitutive (const.) secretion,  
708 extracellular tachyzoites were allowed to release the protein for one hour in absence of  
709 pharmacological trigger. Proteolytic processing of the secreted microneme protein can be  
710 seen as shift in the MIC2 band. Dense granule protein GRA2 was used as a control for  
711 microneme- and Ca<sup>2+</sup>-independent secretion.

712 **B.** Titration of the Ca<sup>2+</sup> ionophore A23187 used for triggering microneme secretion in  
713  $\Delta$ PRP1 and RH $\Delta$ ku80 parent parasites. Extracellular tachyzoites were treated with the  
714 indicated concentrations of A23187 and zaprinast as control for five minutes at 37°C. 10%  
715 represents the non-secreted total protein lysate from 10% of the total parasites used in the  
716 secretion assay.

717 **C.** Representative blot to assess the relative abundance of MIC2 protein in  $\Delta$ PRP1 and  
718 RH $\Delta$ ku80 parent parasites lysates. Total parasite lysates were serially diluted and blots

719 probed with the antisera as indicated. GRA1 (dense granules) and IMC1 (cytoskeleton)  
720 were used as loading control markers.

721 **D.** Immunofluorescence displaying morphology of the secretory organelles in  $\Delta$ PRP1 and  
722 RH $\Delta$ ku80 parent parasites. MIC2: micronemes; ROP1: rhoptries; GRA1 dense granules  
723 (all in green). DAPI marks DNA.

724

725 **Figure 4. Sub-cellular localization of PRP1 by antiserum.**

726 **A.** PRP1 antiserum was used to probe methanol (MetOH) or 4% paraformaldehyde (PFA)  
727 fixed wild type (RH $\Delta$ ku80) and  $\Delta$ PRP1 parasites, intracellular or extracellular, as indicated.  
728 IMC3 antiserum was used as control for the cortical cytoskeleton; DAPI stains DNA. Note  
729 that PFA fixation either destroys the epitope recognized by the PRP1 antiserum or  
730 destroys the structure to which PRP1 localizes.

731 **B.** Fractionation of wild type parasites shows that PRP1 is present in both a membrane  
732 associated and non-membrane associated, soluble fraction. Top: flowchart of fractionation  
733 strategy. Bottom: western blots of fractions probed with antisera as indicated. Protein  
734 sizes as follows: PRP1, 64 kDa; CDPK1, 65 kDa; MIC2, 87 kDa.

735

736 **Figure 5. Sub-cellular localization of PRP1 through endogenous tagging.**

737 **A.** Schematic representation of generating of C-terminal endogenously YFP-tagged  
738 gPRP1-YFP parasites by single homologous recombination into the RH $\Delta$ ku80 parent line.

739 **B.** PCR validation of gPRP1-YFP genotype using the primer pair shown in panel A.

740 **C.** Live imaging of gPRP1-YFP parasites under intracellular and extracellular conditions as  
741 indicated. PC: phase-contrast.

742 **D.** Live imaging of gPRP1-YFP parasites co-transfected with markers for the IMC (IMC1-  
743 mCherry), rhoptries (TLN1-mCherry), and micronemes (MIC8-mCherry).

744 **E.** Representative images of intracellular gPRP1-YFP parasites fixed using either 100%  
745 methanol (MetOH) or 4% paraformaldehyde (PFA) stained with  $\alpha$ -PRP1 and  $\alpha$ -GFP  
746 antisera as indicated. Note that PFA fixation destroys the co-staining of GFP and PRP1  
747 and thus destroys the PRP1 epitope(s) recognized by the specific anti-serum.

748 **F.** Representative western blot of microneme secretion assay on gPRP1-YFP parasites  
749 and RH $\Delta$ ku80 and  $\Delta$ PRP1 controls. Extracellular tachyzoites were treated with A23187  
750 (A), zaprinast (zapr.) or DMSO (D; mock) for five minutes at 37°C. For constitutive (const.)  
751 secretion, the tachyzoites were allowed to release the protein for one hour. Dense granule  
752 protein GRA1 was used as control for microneme- and Ca<sup>2+</sup>-independent secretion.

753

754 **Figure 6. PGM2 is also required for Ca<sup>2+</sup>-trigger induced microneme secretion and**  
755 **does not complement for loss of PRP1.**

756 **A.** Schematic representation of generating PGM2 knockouts by double homologous  
757 recombination into the RHΔku80 or ΔPRP1 as parent lines. Blue boxes indicate the  
758 homologous regions used to replace the endogenous locus. The light blue boxes indicate  
759 the exons in the genomic locus of *pgm2*. PCR 1-5 indicate the diagnostic PCR reactions  
760 (shown in B).

761 **B.** Diagnostic PCR reactions validating the replacement of the PGM2 locus with the DHFR  
762 cassette in both the RHΔku80 and ΔPRP1 background. M represents 1 kb DNA ladder  
763 (NEB).

764 **C.** Diagnostic western blot to validate the presence or absence of PRP1 protein in the  
765 generated ΔPGM2 parasite lines in the RHΔku80 or ΔPRP1 backgrounds, respectively. α-  
766 tubulin antibody was used as loading control. Numbers in the left represent the protein  
767 molecular weight marker.

768 **D.** Representative images of plaque assays performed with parasite lines as indicated,  
769 grown undisturbed on a host cell monolayer for seven days.

770 **E.** Representative western blot image of the MIC2 microneme secretion assay. 20%  
771 represents the non-secreted total protein from 20% of the total parasites used for the  
772 secretion assay. Extracellular tachyzoites were treated with DMSO control, ethanol,  
773 A23187, zaprinast (zapr.), or propranolol (prop.) for 5 min at 37°C or assayed for  
774 constitutive (const.) secretion for 1 hr. Dense granule protein GRA2 was used as control  
775 for microneme- and Ca<sup>2+</sup>-independent secretion.

776

777 **Figure 7. PRP1 and PGM2 do not form a heterodimer**

778 RHΔku80 parasites expressing Myc2-PGM2 or untransfected control parasites were  
779 immunoprecipitated with α-Myc beads and western blots probed with either Myc or PRP1  
780 antisera as indicated. No interaction between Myc2-PGM2 and PRP1 is detected. CL:  
781 cleared lysate; FT: flow through; W1, 2, 3: wash 1, 2, 3; EL: eluate.

782

783 **Figure 8. Loss of the PRP1/PGM2 complex does not affect metabolism or acute**  
784 **virulence in mice.**

785 **A.** ATP levels were determined for intracellularly growing parasite lines as indicated. n=3  
786 +s.d.



787 **B.** Acute virulence in BALB/c mice was assessed by i.p. infection of 1,000 tachyzoites of  
788 the parasite lines as indicated. Weight changes relative to day 0 are shown for each  
789 mouse; averages per group are shown by the horizontal bar; plotted lines represent  
790 average. All mice in each group either died or were euthanized at day 8 p.i.

791 **Figure 1**

792

793

794

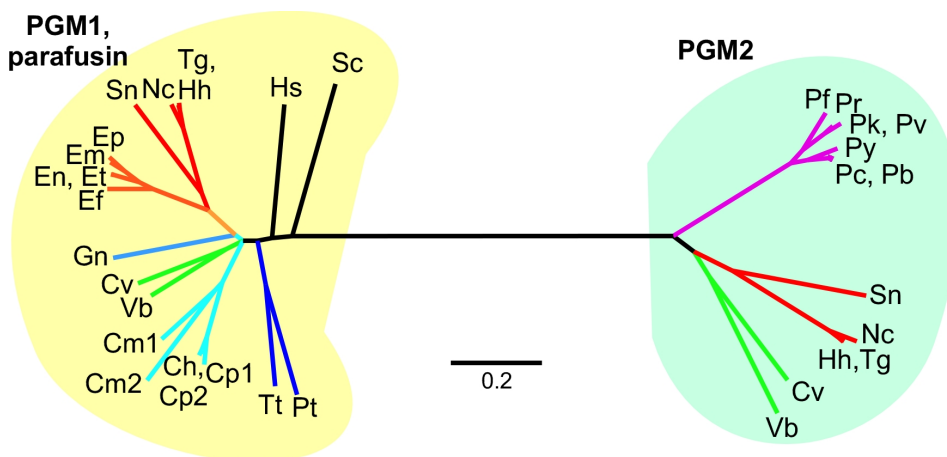

795

796

797

798

799

800

801

802

803

804

**Figure 2**

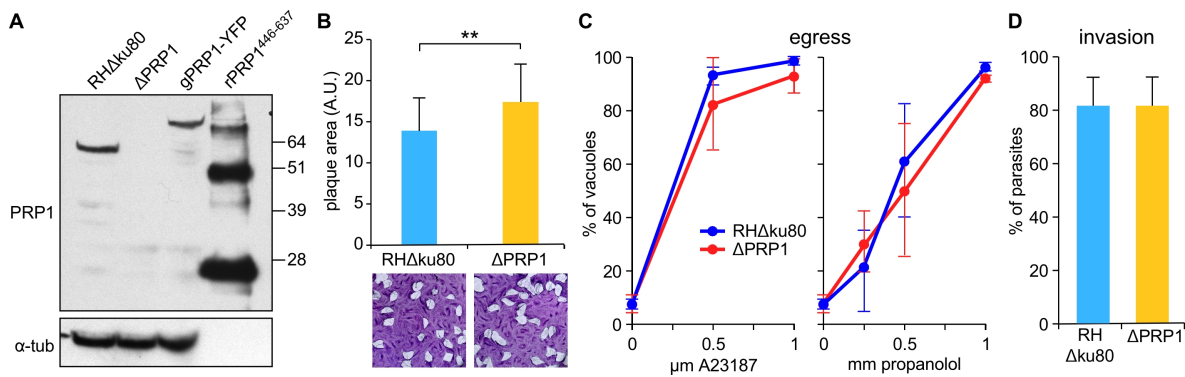

805

806

807  
808  
809

**Figure 3**

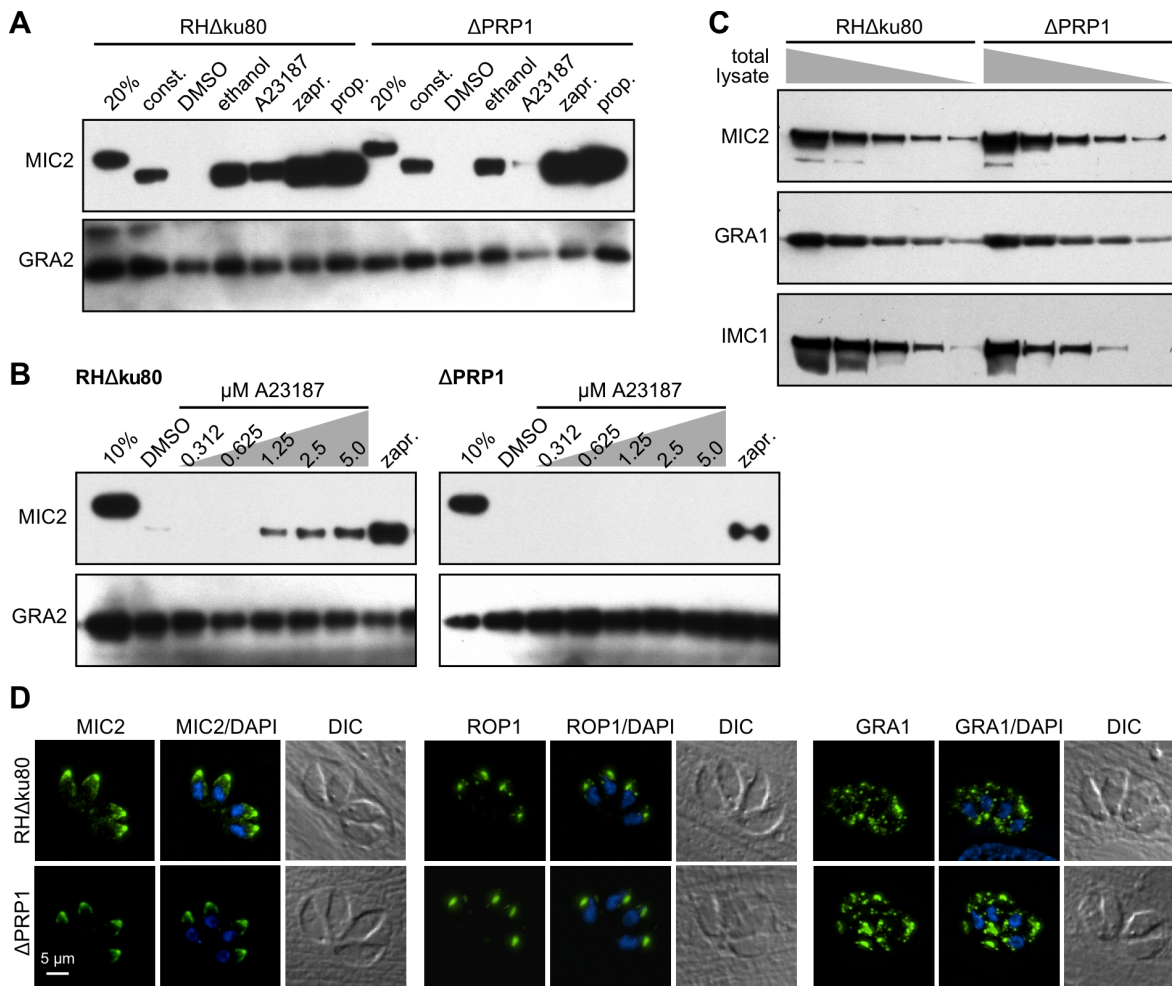

810  
811

812 **Figure 4**  
 813  
 814

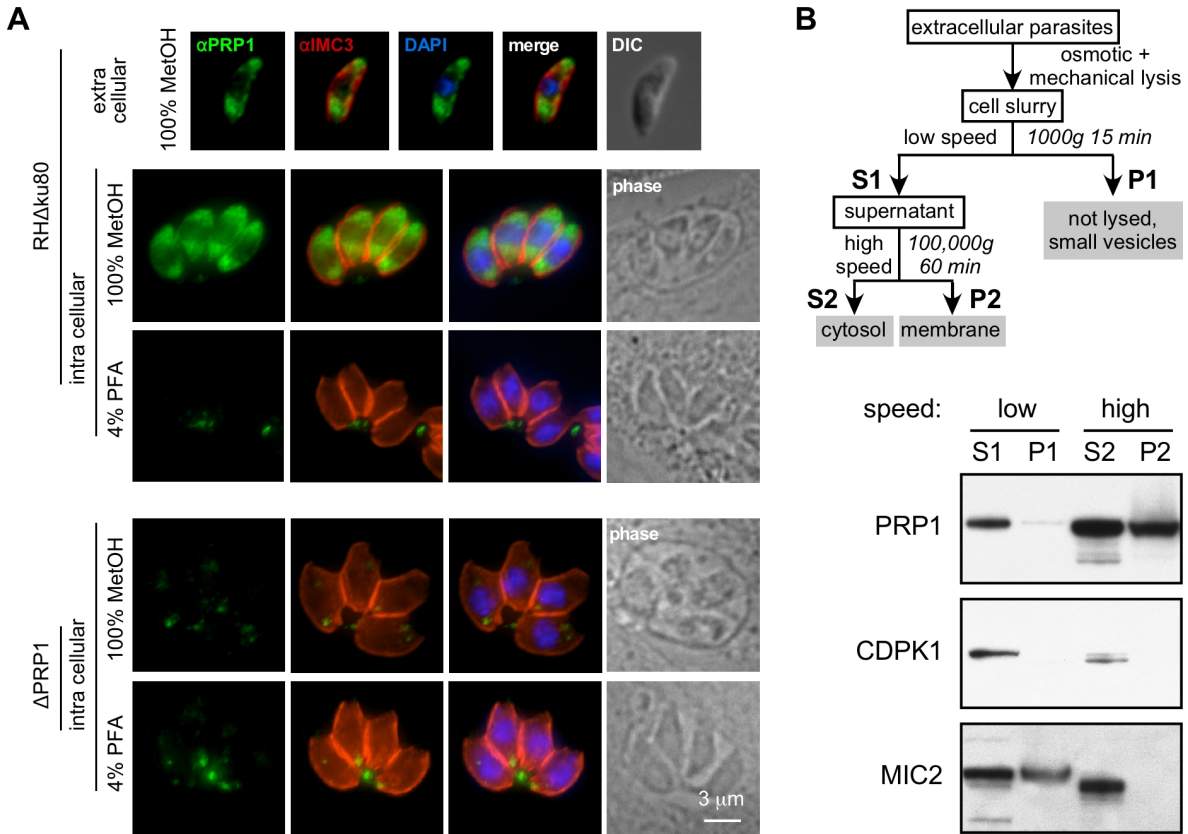

815  
 816  
 817  
 818  
 819

820 **Figure 5**

821

822

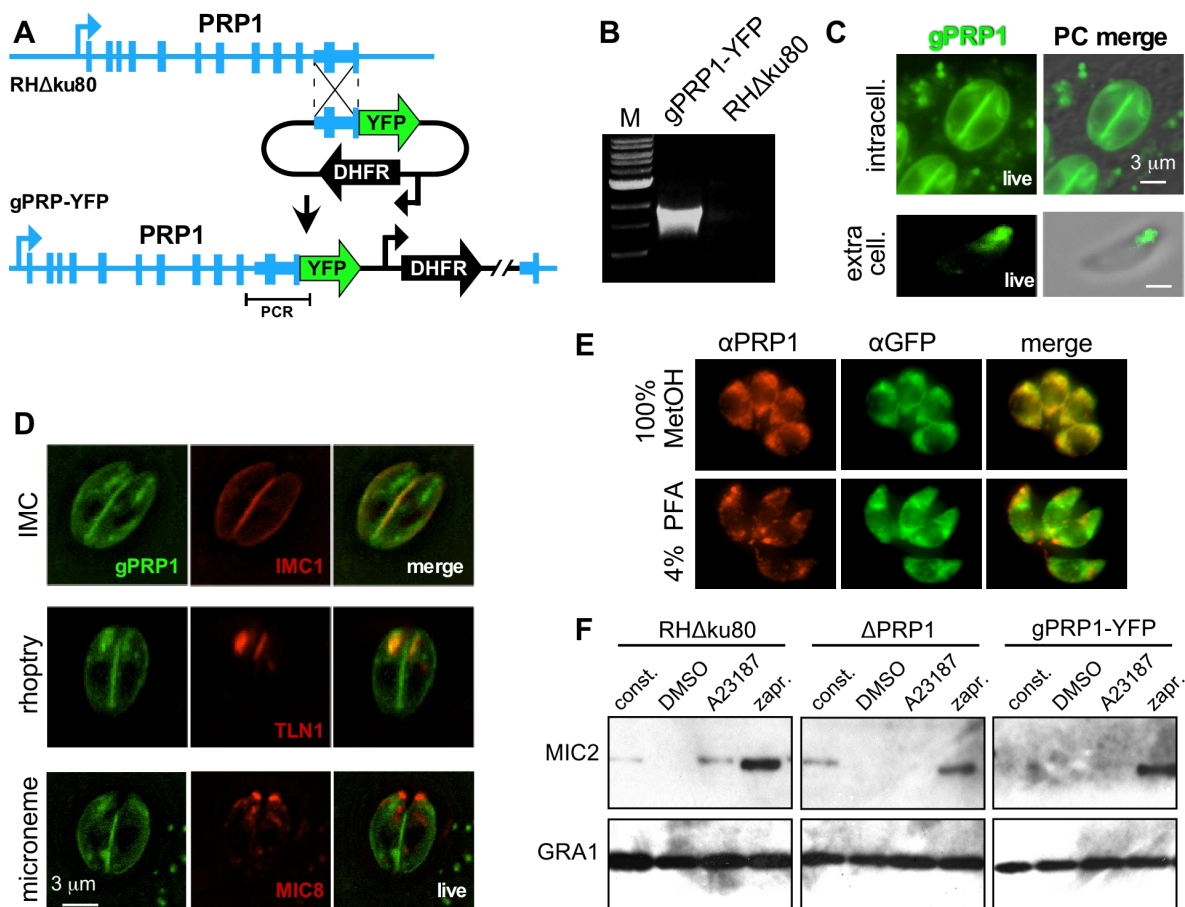

823

824

825 **Figure 6**

826

827

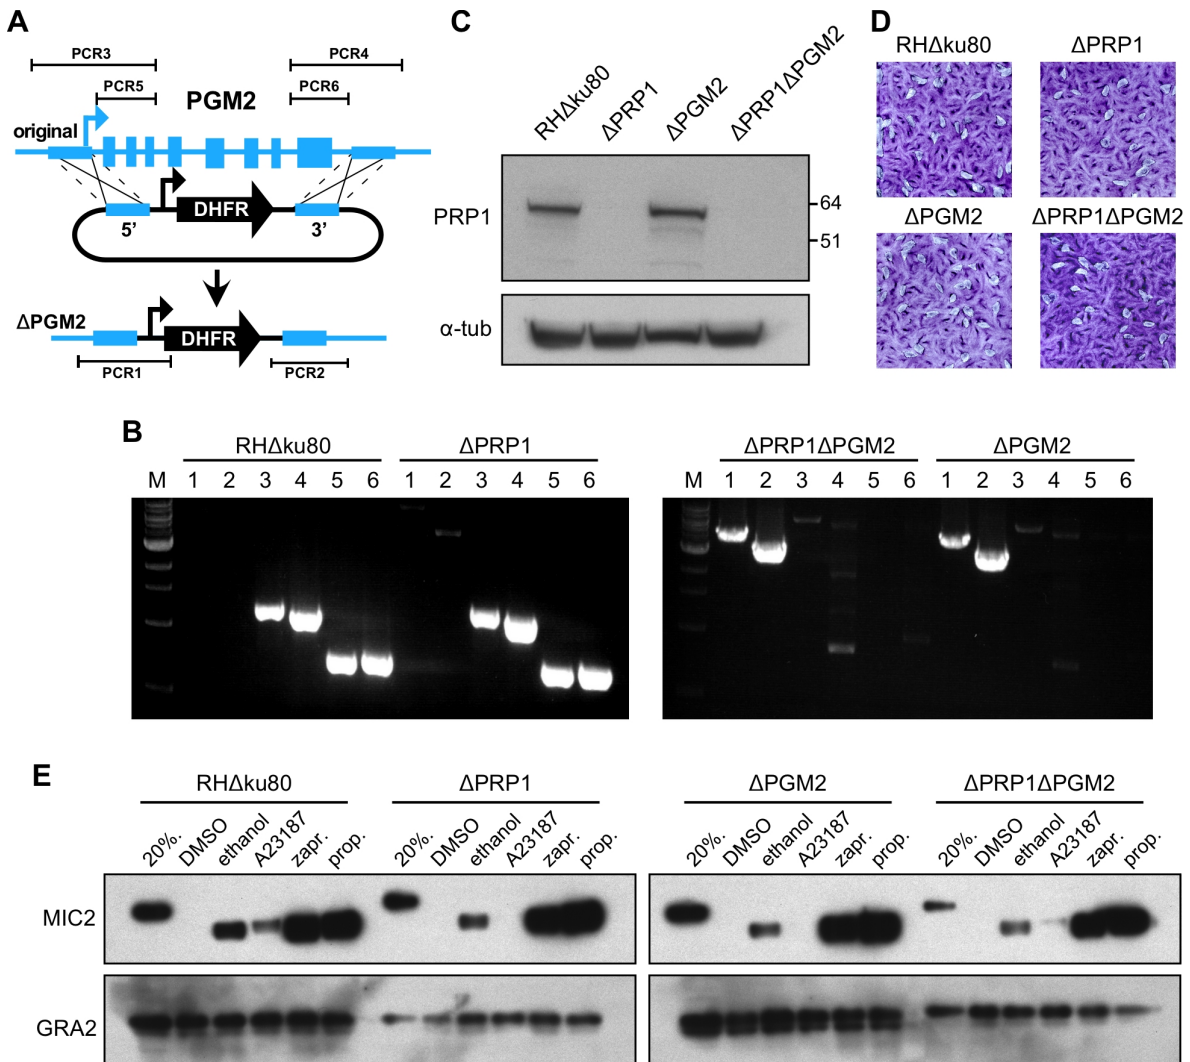

828

829

830 **Figure 7**  
831

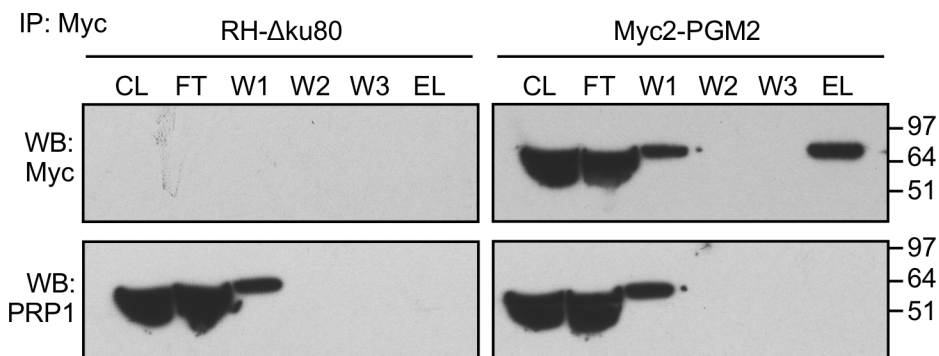

832  
833  
834  
835  
836 **Figure 8**  
837  
838

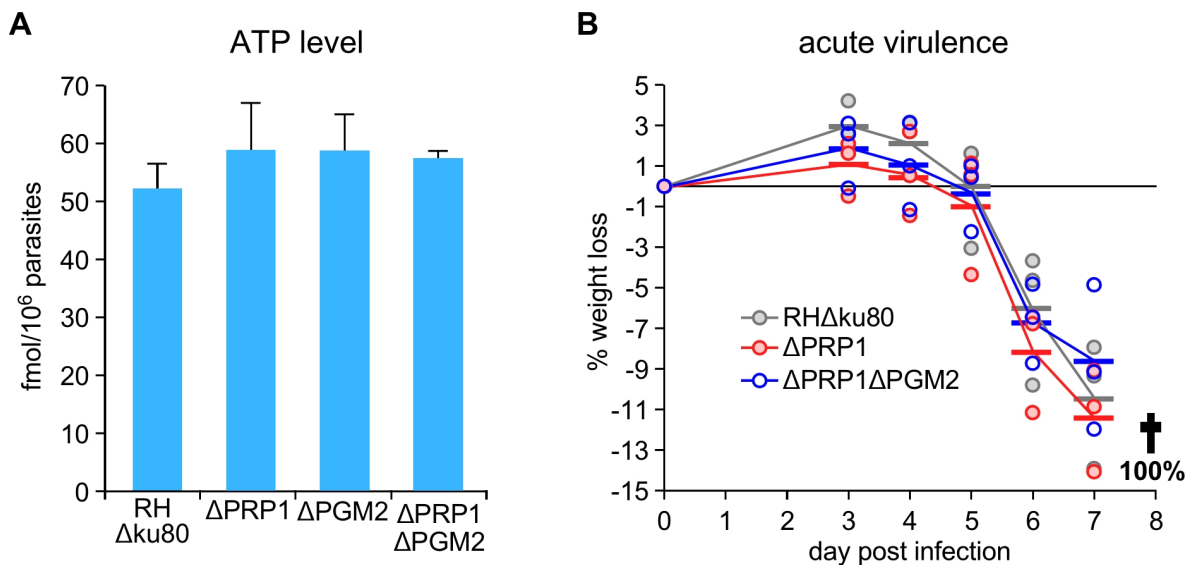

839  
840

841 **REFERENCES CITED**

842

- 843 Abramoff, M. D. M., P. J.; Ram, S. , (2004) Image Processing with ImageJ. *Biophotonics*  
844 *International*.
- 845 Alexandrov, A., M. Vignali, D. J. LaCount, E. Quartley, C. de Vries, D. De Rosa, J.  
846 Babulski, S. F. Mitchell, L. W. Schoenfeld, S. Fields, W. G. Hol, M. E. Dumont, E. M.  
847 Phizicky & E. J. Grayhack, (2004) A facile method for high-throughput co-expression  
848 of protein pairs. *Mol Cell Proteomics* **3**: 934-938.
- 849 Andenmatten, N., S. Egarter, A. J. Jackson, N. Jullien, J. P. Herman & M. Meissner,  
850 (2012) Conditional genome engineering in *Toxoplasma gondii* uncovers alternative  
851 invasion mechanisms. *Nat Methods* **10**: 125-127.
- 852 Andersen, A. P., E. Wyroba, M. Reichman, H. Zhao & B. H. Satir, (1994) The activity of  
853 parafusin is distinct from that of phosphoglucomutase in the unicellular eukaryote  
854 *Paramecium*. *Biochem Biophys Res Commun* **200**: 1353-1358.
- 855 Anderson-White, B. R., F. D. Ivey, K. Cheng, T. Szatanek, A. Lorestani, C. J. Beckers, D.  
856 J. Ferguson, N. Sahoo & M. J. Gubbels, (2011) A family of intermediate filament-like  
857 proteins is sequentially assembled into the cytoskeleton of *Toxoplasma gondii*. *Cell*  
858 *Microbiol* **13**: 18-31.
- 859 Andreotti, G., M. C. Monti, V. Citro & M. V. Cubellis, (2015) Heterodimerization of Two  
860 Pathological Mutants Enhances the Activity of Human Phosphomannomutase2.  
861 *PLoS One* **10**: e0139882.
- 862 Bandini, G., K. Marino, M. L. Guther, A. K. Wernimont, S. Kuettel, W. Qiu, S. Afzal, A.  
863 Kelner, R. Hui & M. A. Ferguson, (2012) Phosphoglucomutase is absent in  
864 *Trypanosoma brucei* and redundantly substituted by phosphomannomutase and  
865 phospho-N-acetylglucosamine mutase. *Mol Microbiol* **85**: 513-534.
- 866 Baum, J., T. W. Gilberger, F. Frischknecht & M. Meissner, (2008) Host-cell invasion by  
867 malaria parasites: insights from *Plasmodium* and *Toxoplasma*. *Trends Parasitol* **24**:  
868 557-563.
- 869 Blader, I. J., B. I. Coleman, C. T. Chen & M. J. Gubbels, (2015) Lytic Cycle of *Toxoplasma*  
870 *gondii*: 15 Years Later. *Annu Rev Microbiol*.
- 871 Blume, M., D. Rodriguez-Contreras, S. Landfear, T. Fleige, D. Soldati-Favre, R. Lucius &  
872 N. Gupta, (2009) Host-derived glucose and its transporter in the obligate intracellular  
873 pathogen *Toxoplasma gondii* are dispensable by glutaminolysis. *Proc Natl Acad Sci*  
874 *U S A* **106**: 12998-13003.
- 875 Boles, E., W. Liebetrau, M. Hofmann & F. K. Zimmermann, (1994) A family of  
876 hexosephosphate mutases in *Saccharomyces cerevisiae*. *Eur J Biochem* **220**: 83-96.
- 877 Brochet, M., M. O. Collins, T. K. Smith, E. Thompson, S. Sebastian, K. Volkmann, F.  
878 Schwach, L. Chappell, A. R. Gomes, M. Berriman, J. C. Rayner, D. A. Baker, J.  
879 Choudhary & O. Billker, (2014) Phosphoinositide metabolism links cGMP-dependent  
880 protein kinase G to essential Ca(2)(+) signals at key decision points in the life cycle  
881 of malaria parasites. *PLoS biology* **12**: e1001806.
- 882 Brown, K. M., E. Suvorova, A. Farrell, B. B. Wiley, G. Marth, P. M. Gaffney, M.-J. Gubbels,  
883 M. White & B. I. J., (2014) Forward Genetic Screening Identifies a Small Molecule  
884 that Blocks *Toxoplasma gondii* Growth By Inhibiting Both Host- and Parasite-  
885 Encoded Kinases. *PLoS Pathog* **10**: e1004180.
- 886 Bullen, H. E., Y. Jia, Y. Yamaryo-Botte, H. Bisio, O. Zhang, N. K. Jemelin, J. B. Marq, V.  
887 Carruthers, C. Y. Botte & D. Soldati-Favre, (2016) Phosphatidic Acid-Mediated  
888 Signaling Regulates Microneme Secretion in *Toxoplasma*. *Cell Host Microbe* **19**:  
889 349-360.



- 890 Burg, J. L., D. Perelman, L. H. Kasper, P. L. Ware & J. C. Boothroyd, (1988) Molecular  
891 analysis of the gene encoding the major surface antigen of *Toxoplasma gondii*.  
892 *Journal of immunology* **141**: 3584-3591.
- 893 Carruthers, V. B., S. N. Moreno & L. D. Sibley, (1999) Ethanol and acetaldehyde elevate  
894 intracellular [Ca<sup>2+</sup>] and stimulate microneme discharge in *Toxoplasma gondii*.  
895 *Biochem J* **342 ( Pt 2)**: 379-386.
- 896 Carruthers, V. B. & L. D. Sibley, (1999) Mobilization of intracellular calcium stimulates  
897 microneme discharge in *Toxoplasma gondii*. *Mol Microbiol* **31**: 421-428.
- 898 Cesbron-Delauw, M. F., B. Guy, G. Torpier, R. J. Pierce, G. Lenzen, J. Y. Cesbron, H.  
899 Charif, P. Lepage, F. Darcy, J. P. Lecocq & et al., (1989) Molecular characterization  
900 of a 23-kilodalton major antigen secreted by *Toxoplasma gondii*. *Proc Natl Acad Sci*  
901 *U S A* **86**: 7537-7541.
- 902 Chilcoat, N. D. & A. P. Turkewitz, (1997) In vivo analysis of the major exocytosis-sensitive  
903 phosphoprotein in *Tetrahymena*. *J Cell Biol* **139**: 1197-1207.
- 904 Couvreur, G., A. Sadak, B. Fortier & J. F. Dubremetz, (1988) Surface antigens of  
905 *Toxoplasma gondii*. *Parasitology* **97 ( Pt 1)**: 1-10.
- 906 Donald, R. G. & P. A. Liberator, (2002) Molecular characterization of a coccidian parasite  
907 cGMP dependent protein kinase. *Mol Biochem Parasitol* **120**: 165-175.
- 908 Dubey, R., B. L. Staker, I. T. Foe, M. Bogyo, P. J. Myler, H. M. Ngo & M. J. Gubbels,  
909 (2016) Membrane skeletal association and post-translational allosteric regulation of  
910 *Toxoplasma gondii* GAPDH1. *Mol Microbiol*.
- 911 Eidell, K. P., T. Burke & M. J. Gubbels, (2010) Development of a screen to dissect  
912 *Toxoplasma gondii* egress. *Molecular and biochemical parasitology* **171**: 97-103.
- 913 Farrell, A., S. Thirugnanam, A. Lorestani, J. D. Dvorin, K. P. Eidell, D. J. Ferguson, B. R.  
914 Anderson-White, M. T. Duraisingh, G. T. Marth & M. J. Gubbels, (2012) A DOC2  
915 protein identified by mutational profiling is essential for apicomplexan parasite  
916 exocytosis. *Science* **335**: 218-221.
- 917 Fu, L., A. Miseta, D. Hunton, R. B. Marchase & D. M. Bedwell, (2000) Loss of the major  
918 isoform of phosphoglucomutase results in altered calcium homeostasis in  
919 *Saccharomyces cerevisiae*. *J Biol Chem* **275**: 5431-5440.
- 920 Gilligan, D. M. & B. H. Satir, (1982) Protein phosphorylation/dephosphorylation and  
921 stimulus-secretion coupling in wild type and mutant *Paramecium*. *J Biol Chem* **257**:  
922 13903-13906.
- 923 Gubbels, M. J., C. Li & B. Striepen, (2003) High-throughput growth assay for *Toxoplasma*  
924 *gondii* using yellow fluorescent protein. *Antimicrob Agents Chemother* **47**: 309-316.
- 925 Hajagos, B. E., J. M. Turetzky, E. D. Peng, S. J. Cheng, C. M. Ryan, P. Souda, J. P.  
926 Whitelegge, M. Lebrun, J. F. Dubremetz & P. J. Bradley, (2012) Molecular dissection  
927 of novel trafficking and processing of the *Toxoplasma gondii* rho-tryptophan metalloprotease  
928 toxolysin-1. *Traffic* **13**: 292-304.
- 929 Hannah, M. J., U. Weiss & W. B. Huttner, (1998) Differential extraction of proteins from  
930 paraformaldehyde-fixed cells: lessons from synaptophysin and other membrane  
931 proteins. *Methods* **16**: 170-181.
- 932 Hofmann, M., E. Boles & F. K. Zimmermann, (1994) Characterization of the essential  
933 yeast gene encoding N-acetylglucosamine-phosphate mutase. *Eur J Biochem* **221**:  
934 741-747.
- 935 Huynh, M. H. & V. B. Carruthers, (2009) Tagging of endogenous genes in a *Toxoplasma*  
936 *gondii* strain lacking Ku80. *Eukaryot Cell* **8**: 530-539.
- 937 Imada, M., S. Kawashima, M. Kanehisa, T. Takeuchi & T. Asai, (2010) Characterization of  
938 alpha-phosphoglucomutase isozymes from *Toxoplasma gondii*. *Parasitol Int* **59**: 206-  
939 210.

- 940 Ingram, J. R., K. E. Knockenhauer, B. M. Markus, J. Mandelbaum, A. Ramek, Y. Shan, D.  
941 E. Shaw, T. U. Schwartz, H. L. Ploegh & S. Lourido, (2015) Allosteric activation of  
942 apicomplexan calcium-dependent protein kinases. *Proc Natl Acad Sci U S A* **112**:  
943 E4975-4984.
- 944 Jacot, D., N. Tosesti, I. Pires, J. Stock, A. Graindorge, Y. F. Hung, H. Han, R. Tewari, I.  
945 Kursula & D. Soldati-Favre, (2016) An Apicomplexan Actin-Binding Protein Serves  
946 as a Connector and Lipid Sensor to Coordinate Motility and Invasion. *Cell Host*  
947 *Microbe* **20**: 731-743.
- 948 Kafsack, B. F., C. Beckers & V. B. Carruthers, (2004) Synchronous invasion of host cells  
949 by *Toxoplasma gondii*. *Mol Biochem Parasitol* **136**: 309-311.
- 950 Kearse, M., R. Moir, A. Wilson, S. Stones-Havas, M. Cheung, S. Sturrock, S. Buxton, A.  
951 Cooper, S. Markowitz, C. Duran, T. Thierer, B. Ashton, P. Meintjes & A. Drummond,  
952 (2012) Geneious Basic: an integrated and extendable desktop software platform for  
953 the organization and analysis of sequence data. *Bioinformatics* **28**: 1647-1649.
- 954 Kessler, H., A. Herm-Gotz, S. Hegge, M. Rauch, D. Soldati-Favre, F. Frischknecht & M.  
955 Meissner, (2008) Microneme protein 8--a new essential invasion factor in  
956 *Toxoplasma gondii*. *J Cell Sci* **121**: 947-956.
- 957 Kissmehl, R., T. Treptau, H. W. Hofer & H. Plattner, (1996) Protein phosphatase and  
958 kinase activities possibly involved in exocytosis regulation in *Paramecium tetraurelia*.  
959 *Biochem J* **317 ( Pt 1)**: 65-76.
- 960 Kussmann, M., K. Hauser, R. Kissmehl, J. Breed, H. Plattner & P. Roepstorff, (1999)  
961 Comparison of in vivo and in vitro phosphorylation of the exocytosis-sensitive protein  
962 PP63/parafusin by differential MALDI mass spectrometric peptide mapping.  
963 *Biochemistry* **38**: 7780-7790.
- 964 Labruyere, E., M. Lingnau, C. Mercier & L. D. Sibley, (1999) Differential membrane  
965 targeting of the secretory proteins GRA4 and GRA6 within the parasitophorous  
966 vacuole formed by *Toxoplasma gondii*. *Mol Biochem Parasitol* **102**: 311-324.
- 967 Levin, S., S. C. Almo & B. H. Satir, (1999) Functional diversity of the phosphoglucomutase  
968 superfamily: structural implications. *Protein Eng* **12**: 737-746.
- 969 Liu, L., S. C. Tucker & B. H. Satir, (2009) *Toxoplasma* PRP1 is an ortholog of parafusin  
970 (PFUS) in vesicle scaffold assembly in Ca(2+)-regulated exocytosis. *Eur J Cell Biol*  
971 **88**: 301-313.
- 972 Liu, L., E. Wyroba & B. H. Satir, (2011) RNAi knockdown of parafusin inhibits the secretory  
973 pathway. *Eur J Cell Biol* **90**: 844-853.
- 974 Lourido, S. & S. N. Moreno, (2015) The calcium signaling toolkit of the Apicomplexan  
975 parasites *Toxoplasma gondii* and *Plasmodium* spp. *Cell Calcium* **57**: 186-193.
- 976 Lourido, S., J. Shuman, C. Zhang, K. M. Shokat, R. Hui & L. D. Sibley, (2010) Calcium-  
977 dependent protein kinase 1 is an essential regulator of exocytosis in *Toxoplasma*.  
978 *Nature* **465**: 359-362.
- 979 Lourido, S., K. Tang & L. D. Sibley, (2012) Distinct signalling pathways control  
980 *Toxoplasma* egress and host-cell invasion. *Embo J* **31**: 4524-4534.
- 981 Lovett, J. L., N. Marchesini, S. N. Moreno & L. D. Sibley, (2002) *Toxoplasma gondii*  
982 microneme secretion involves intracellular Ca(2+) release from inositol 1,4,5-  
983 triphosphate (IP(3))/ryanodine-sensitive stores. *J Biol Chem* **277**: 25870-25876.
- 984 MacRae, J. I., L. Sheiner, A. Nahid, C. Tonkin, B. Striepen & M. J. McConville, (2012)  
985 Mitochondrial metabolism of glucose and glutamine is required for intracellular  
986 growth of *Toxoplasma gondii*. *Cell Host Microbe* **12**: 682-692.
- 987 Matthiesen, S. H., S. M. Shenoy, K. Kim, R. H. Singer & B. H. Satir, (2001) A parafusin-  
988 related *Toxoplasma* protein in Ca<sup>2+</sup>-regulated secretory organelles. *Eur J Cell Biol*  
989 **80**: 775-783.

- 990 Matthiesen, S. H., S. M. Shenoy, K. Kim, R. H. Singer & B. H. Satir, (2003) Role of the  
991 parafusin orthologue, PRP1, in microneme exocytosis and cell invasion in  
992 *Toxoplasma gondii*. *Cell Microbiol* **5**: 613-624.
- 993 Meissner, M., D. J. Ferguson & F. Frischknecht, (2013) Invasion factors of apicomplexan  
994 parasites: essential or redundant? *Curr Opin Microbiol* **16**: 438-444.
- 995 Montoya, J. G. & O. Liesenfeld, (2004) Toxoplasmosis. *Lancet* **363**: 1965-1976.
- 996 Muller, S., K. Diederichs, J. Breed, R. Kissmehl, K. Hauser, H. Plattner & W. Welte, (2002)  
997 Crystal structure analysis of the exocytosis-sensitive phosphoprotein, pp63/parafusin  
998 (phosphoglucomutase), from *Paramecium* reveals significant conformational  
999 variability. *J Mol Biol* **315**: 141-153.
- 1000 Nitzsche, R., V. Zagoriy, R. Lucius & N. Gupta, (2016) Metabolic Cooperation of Glucose  
1001 and Glutamine Is Essential for the Lytic Cycle of Obligate Intracellular Parasite  
1002 *Toxoplasma gondii*. *J Biol Chem* **291**: 126-141.
- 1003 Paul, A. S., S. Saha, K. Engelberg, R. H. Jiang, B. I. Coleman, A. L. Kosber, C. T. Chen,  
1004 M. Ganter, N. Espy, T. W. Gilberger, M. J. Gubbels & M. T. Duraisingh, (2015)  
1005 Parasite Calcineurin Regulates Host Cell Recognition and Attachment by  
1006 Apicomplexans. *Cell Host Microbe* **18**: 49-60.
- 1007 Plattner, H. & R. Kissmehl, (2005) Molecular aspects of rapid, reversible, Ca<sup>2+</sup>-dependent  
1008 de-phosphorylation of pp63/parafusin during stimulated exo-endocytosis in  
1009 *Paramecium* cells. *Cell Calcium* **38**: 319-327.
- 1010 Pomel, S., F. C. Luk & C. J. Beckers, (2008) Host cell egress and invasion induce marked  
1011 relocations of glycolytic enzymes in *Toxoplasma gondii* tachyzoites. *PLoS Pathog* **4**:  
1012 e1000188.
- 1013 Remington, J. S., R. McLeod & G. Desmonts, (1995) Toxoplasmosis. In: Infectious  
1014 diseases of the fetus and newborn infant. J. S. Remington & J. O. Klein (eds).  
1015 Philadelphia: Saunders, pp. 140-267.
- 1016 Roos, D. S., R. G. Donald, N. S. Morrissette & A. L. Moulton, (1994) Molecular tools for  
1017 genetic dissection of the protozoan parasite *Toxoplasma gondii*. *Methods Cell Biol*  
1018 **45**: 27-63.
- 1019 Saeij, J. P., S. Collier, J. P. Boyle, M. E. Jerome, M. W. White & J. C. Boothroyd, (2007)  
1020 *Toxoplasma* co-opts host gene expression by injection of a polymorphic kinase  
1021 homologue. *Nature* **445**: 324-327.
- 1022 Saffer, L. D., O. Mercereau-Puijalon, J. F. Dubremetz & J. D. Schwartzman, (1992)  
1023 Localization of a *Toxoplasma gondii* rhoptry protein by immunoelectron microscopy  
1024 during and after host cell penetration. *J Protozool* **39**: 526-530.
- 1025 Satir, B. H., T. Hamasaki, M. Reichman & T. J. Murtaugh, (1989) Species distribution of a  
1026 phosphoprotein (parafusin) involved in exocytosis. *Proc Natl Acad Sci U S A* **86**:  
1027 930-932.
- 1028 Satir, B. H., C. Srisomsap, M. Reichman & R. B. Marchase, (1990) Parafusin, an exocytic-  
1029 sensitive phosphoprotein, is the primary acceptor for the  
1030 glucosylphosphotransferase in *Paramecium tetraurelia* and rat liver. *J Cell Biol* **111**:  
1031 901-907.
- 1032 Satir, B. H., E. Wyroba, L. Liu, M. Lethan, P. Satir & S. T. Christensen, (2015)  
1033 Evolutionary implications of localization of the signaling scaffold protein parafusin to  
1034 both cilia and the nucleus. *Cell Biol Int* **39**: 136-145.
- 1035 Shen, B. & L. D. Sibley, (2014) *Toxoplasma* aldolase is required for metabolism but  
1036 dispensable for host-cell invasion. *Proc Natl Acad Sci U S A* **111**: 3567-3572.
- 1037 Sidik, S. M., C. G. Hackett, F. Tran, N. J. Westwood & S. Lourido, (2014) Efficient genome  
1038 engineering of *Toxoplasma gondii* using CRISPR/Cas9. *PLoS ONE* **9**: e100450.
- 1039 Sidik, S. M., M. A. Hortua Triana, A. S. Paul, M. El Bakkouri, C. G. Hackett, F. Tran, N. J.  
1040 Westwood, R. Hui, W. J. Zuercher, M. T. Duraisingh, S. N. Moreno & S. Lourido,

- 1041 (2016a) Using a Genetically Encoded Sensor to Identify Inhibitors of *Toxoplasma*  
1042 *gondii* Ca<sup>2+</sup> Signaling. *J Biol Chem* **291**: 9566-9580.
- 1043 Sidik, S. M., D. Huet, S. M. Ganesan, M. H. Huynh, T. Wang, A. S. Nasamu, P. Thiru, J. P.  
1044 Saeij, V. B. Carruthers, J. C. Niles & S. Lourido, (2016b) A Genome-wide CRISPR  
1045 Screen in *Toxoplasma* Identifies Essential Apicomplexan Genes. *Cell* **166**: 1423-  
1046 1435 e1412.
- 1047 Subramanian, S. V. & B. H. Satir, (1992) Carbohydrate cycling in signal transduction:  
1048 parafusin, a phosphoglycoprotein and possible Ca(2+)-dependent transducer  
1049 molecule in exocytosis in *Paramecium*. *Proc Natl Acad Sci U S A* **89**: 11297-11301.
- 1050 Subramanian, S. V., E. Wyroba, A. P. Andersen & B. H. Satir, (1994) Cloning and  
1051 sequencing of parafusin, a calcium-dependent exocytosis-related  
1052 phosphoglycoprotein. *Proc Natl Acad Sci U S A* **91**: 9832-9836.
- 1053 Suvorova, E. S., M. Croken, S. Kratzer, L. M. Ting, M. Conde de Felipe, B. Balu, M. L.  
1054 Markillie, L. M. Weiss, K. Kim & M. W. White, (2013) Discovery of a splicing  
1055 regulator required for cell cycle progression. *PLoS Genet* **9**: e1003305.
- 1056 Tomita, T., T. Yamada, L. M. Weiss & A. Orlofsky, (2009) Externally triggered egress is  
1057 the major fate of *Toxoplasma gondii* during acute infection. *J Immunol* **183**: 6667-  
1058 6680.
- 1059 Treptau, T., R. Kissmehl, J. D. Wissmann & H. Plattner, (1995) A 63 kDa phosphoprotein  
1060 undergoing rapid dephosphorylation during exocytosis in *Paramecium* cells shares  
1061 biochemical characteristics with phosphoglucomutase. *The Biochemical journal* **309**  
1062 ( Pt 2): 557-567.
- 1063 Wan, K. L., V. B. Carruthers, L. D. Sibley & J. W. Ajioka, (1997) Molecular characterisation  
1064 of an expressed sequence tag locus of *Toxoplasma gondii* encoding the micronemal  
1065 protein MIC2. *Mol Biochem Parasitol* **84**: 203-214.
- 1066 Weiss, L. M. & J. P. Dubey, (2009) Toxoplasmosis: A history of clinical observations. *Int J*  
1067 *Parasitol* **39**: 895-901.
- 1068 Wetzel, D. M., L. A. Chen, F. A. Ruiz, S. N. Moreno & L. D. Sibley, (2004) Calcium-  
1069 mediated protein secretion potentiates motility in *Toxoplasma gondii*. *J Cell Sci* **117**:  
1070 5739-5748.
- 1071 Wyroba, E., A. Widding Hoyer, P. Storgaard & B. H. Satir, (1995) Mammalian homologue  
1072 of the calcium-sensitive phosphoglycoprotein, parafusin. *Eur J Cell Biol* **68**: 419-426.
- 1073 Zhao, H. & B. H. Satir, (1998) Parafusin is a membrane and vesicle associated protein  
1074 that cycles at exocytosis. *Eur J Cell Biol* **75**: 46-53.
- 1075  
1076

1077 **Supplementary Table S1.** Sequences of primers used.  
1078

| <i>Primer name</i>                                       | <i>Sequence - Restriction Enzyme sites underlined</i> |
|----------------------------------------------------------|-------------------------------------------------------|
| <b>Tagging of the PRP1 endogenous locus</b>              |                                                       |
| PRP1-LIC-F                                               | TACTTCCAATCCAATTTAATGCCAGCTACGAAGGAAACAGA             |
| PRP1-LIC-R                                               | TCCTCCACTTCCAATTTTAGCCGTAATGACAGTTGGCGTCT             |
| PRP1-int-chk-F                                           | CGAAGAGTCTTTTCGGCACAGGAAGCG                           |
| <b>Generation and verification of knockout of PRP1</b>   |                                                       |
| 5'PRP1-KpnI-F                                            | CAGGGT <u>ACCACGCAGAA</u> AGTGCAGCTCTTG               |
| 5'PRP1-KpnI-R                                            | CAGGGT <u>ACCGGAAGCCT</u> CGGTTTCTTCC                 |
| 3'PRP1-SacI-F                                            | CAGGAGCTCGACGGGTGTTGCTGCTTTTTTC                       |
| 3'PRP1-SacI-R                                            | CAGGAGCTCGAGAAACACTGTA <u>CTCGTACAA</u> ATG           |
| Xho-tub-FnsI                                             | CAGCTC <u>GAGGACATGCATGTCCCGCG</u>                    |
| Xho-3dhfr-R                                              | TCGCCTC <u>GAGCTAGAACTAGCTAGTGGAC</u>                 |
| PRP1-EcoRV-F                                             | CAGGATATC <u>AAAATGGGGGCCAAGGCAAGC</u>                |
| PRP1-EcoRV-R                                             | CAGGATAT <u>CCGTAATGACAGTTGGCGTCT</u>                 |
| HXGPRTseq-R                                              | CCTTGCCCTTGCCGTAGTC                                   |
| <b>Generation of PRP1 specific antiserum</b>             |                                                       |
| aPRP1-LIC-F                                              | GGTCCTGGTTCGTGCATGGGTGATGTGGAG                        |
| aPRP1-LIC-R                                              | CTTGTCGTGCTGTTTATTACGTAATGACAGTTGGCGTC                |
| <b>Generation and verification of knockout of PGM2</b>   |                                                       |
| 5'TgPGM2-UTR-F                                           | GGCCGTTGTGTCCCACTTCCCGGTC ACTCGAGGTCGACGGTATCG        |
| 3'PGM2-UTR-R                                             | GTGCACGCGTTAGATGCTTATGCGGCCGCTCTAGA <u>ACTAG</u>      |
| 5PGM2-dKO-s                                              | AAGTTGTCCGGTTCCTCACAAGCGG                             |
| 5PGM2-dKO-as                                             | AAAACCGCTTGTGAGGGAACCGGACA                            |
| 3PGM2-dKO-s                                              | AAGTTGATCCAGGTCACACTCTGATG                            |
| 3PGM2-dKO-as                                             | AAAACATCAGAGTGTGACCTGGATCA                            |
| 5'PGM2-dKO-int-F                                         | GTCACGTAGACGGTGGACG                                   |
| 5'PGM2-dKO-int-R                                         | GCTGAACTCACCTGGGTAG                                   |
| 3'PGM2-dKO-int-F                                         | CATTTCCAGGAAAACGGCTGC                                 |
| 3'PGM2-dKO-int-R                                         | CAACTCGACACCCGAAACAG                                  |
| <b>Generation of Myc2-tagged PGM2 expression plasmid</b> |                                                       |
| PGM2-AvrII-F                                             | CAGCCTAGGAAAATGTCTGTCTCGCAAACAGAAAG                   |
| PGM2-EcoRV-R                                             | CAGGATATCTCAGAGTGTGACCTGGATCG                         |

1079

1080 **Supplementary Figures:**

1081

1082 **Figure S1**

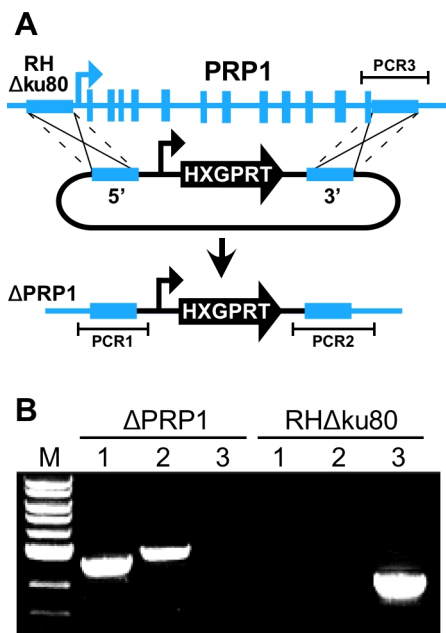

1083

1084

1085 **Figure S1. Generation and validation of  $\Delta$ PRP1 parasite line**

1086 **A.** Schematic of the generation of PRP1 knockout parasites. Medium height blue boxes  
1087 indicate the 5' and 3' homologous regions used to replace the endogenous locus along  
1088 with the endogenous promoter; Tall blue boxes represent PRP1 exons. PCR 1, 2 and 3  
1089 indicate the amplicons generated by the diagnostic PCRs (shown in panel B).

1090 **B.** PCR analysis validating the replacement of the endogenous locus with the drug  
1091 selection cassette (shown in A) using the genomic DNA of  $\Delta$ PRP1 and parental RH $\Delta$ ku80  
1092 parasites as templates. Specific primer pairs correspond to the PCRs illustrated in panel A.  
1093 M represents 1 kb DNA ladder (NEB).

1094 **Figure S2**

1095

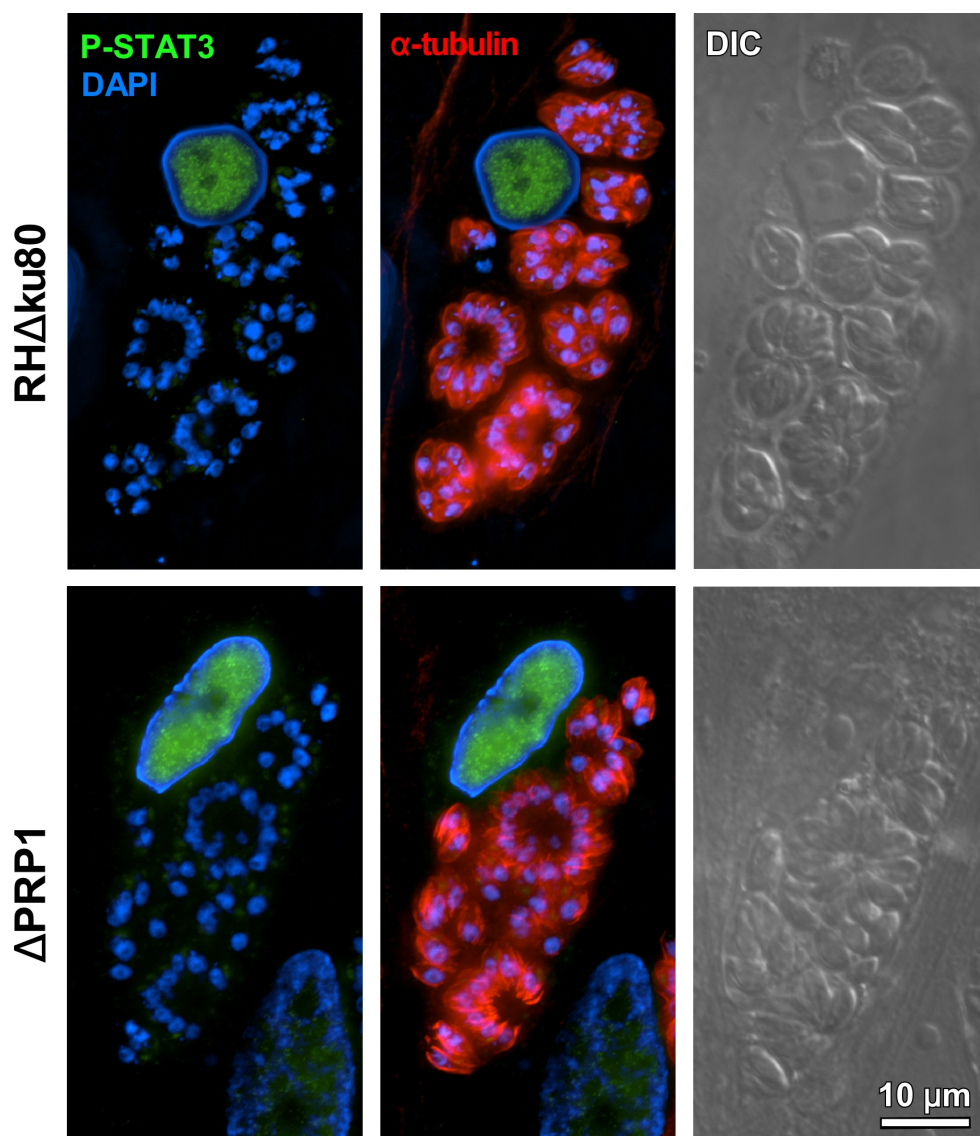

1096

1097

1098 **Figure S2. Absence of PRP1 does not interfere with rhoptry secretion.**

1099 Rhoptry secretion was monitored by phosphorylated STAT3 (P-STAT3) accumulating in in

1100 the nucleus of the infected host cell as STAT3 is phosphorylated by the rhoptry protein

1101 ROP16 (Saeij et al., 2007). DAPI stains the nuclear material whereas the parasites

1102 cytoskeleton is stained with α-tubulin MA b 12G10.

1103 **Figure S3**

1104

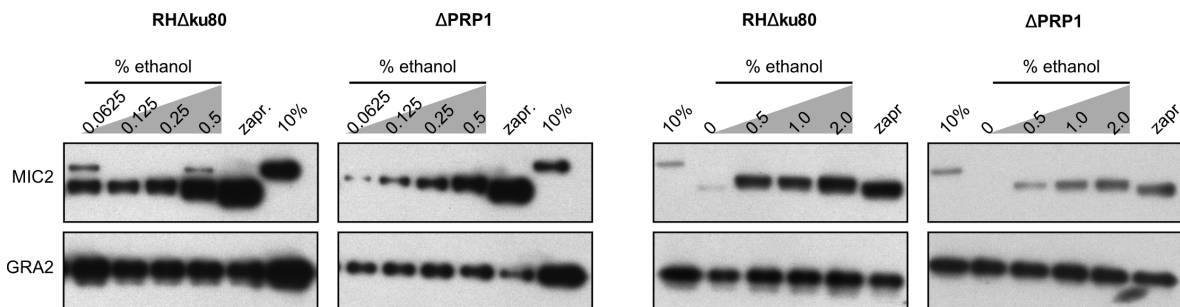

1105

1106

1107 **Figure S3. Titration of ethanol induced microneme secretion**

1108 Extracellular tachyzoites were treated with different ethanol amounts and zaprinast (zapr.)  
1109 as indicated for five minutes at 37°C. 10% represents protein lysate from 10% of the total  
1110 parasites used for the assay. MIC2 was used as the marker for microneme secretion and  
1111 GRA2 used as the control.

1112

1113

1114

1115 **Figure S4**

1116

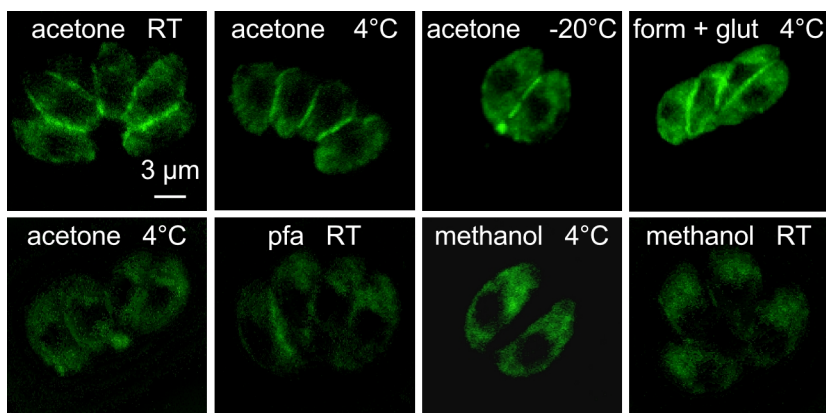

1117

1118

1119 **Figure S4. Effect of different fixatives of pPRP1-YFP localization.**

1120 Representative images of intracellular gPRP1-YFP parasites fixed using different fixative  
1121 at different temperatures. Acetone: 100% acetone; pfa: 4% paraformaldehyde; methanol:  
1122 100% methanol; form + glut: 2.5% formaldehyde and 0.05% glutaraldehyde. RT is room  
1123 temperature.
